# Supplementary material for: Does geometry matter? Effect of the ligand position in bimetallic ruthenium polypyridine siblings
Source: Royal Society of Chemistry journal article supplement (doi:10.1039/d0dt00040j), 2020-01-01
Supplement: d0dt00040j1.pdf [file d0dt00040j1.pdf]

## ELECTRONIC SUPPLEMENTARY INFORMATION

# Does Geometry Matter? Effect of Ligand Position in Bimetallic Ruthenium Polypyridines Siblings

*Sofía E. Domínguez, German E. Pieslinger, Luciano Sanchez-Merlinsky and Luis M. Baraldo*

| <b>Contents</b>                                            | <b>Page</b> |
|------------------------------------------------------------|-------------|
| <b>Structural characterization</b>                         | <b>S2</b>   |
| Table S1                                                   | S2          |
| Table S2                                                   | S3          |
| Figure S1                                                  | S4          |
| <b>Cyclic Voltammograms</b>                                | <b>S5</b>   |
| Figure S2                                                  | S5          |
| <b>VIS-NIR spectroelectrochemistry</b>                     | <b>S6</b>   |
| Figure S3                                                  | S6          |
| <b>Solvent dependence of NIR bands</b>                     | <b>S7</b>   |
| Figure S4                                                  | S7          |
| <b>IR spectroelectrochemistry</b>                          | <b>S8</b>   |
| Figure S5                                                  | S8          |
| <b>DFT calculations</b>                                    | <b>S9</b>   |
| Figure S6                                                  | S9          |
| Figure S7                                                  | S10         |
| Table S3                                                   | S11         |
| Figure S8                                                  | S11         |
| Table S4                                                   | S15         |
| Figure S9                                                  | S15         |
| Figure S10                                                 | S16         |
| Figure S11                                                 | S23         |
| Figure S12                                                 | S24         |
| Figure S13                                                 | S25         |
| <b>Comparison between Ruthenium Polypyridines Siblings</b> | <b>S25</b>  |
| Table S5                                                   | S25         |
| Figure S14                                                 | S26         |

## Structural characterization

**Table S1.** Crystallographic data for [RuRuNCS](PF<sub>6</sub>)<sub>2</sub>·C<sub>3</sub>H<sub>6</sub>O

|                                            |                                                                                                                                                                       |
|--------------------------------------------|-----------------------------------------------------------------------------------------------------------------------------------------------------------------------|
| Empirical Formula                          | C50 H45 F12 N11 O P2 Ru2 S                                                                                                                                            |
| Formula weight                             | 1340.11                                                                                                                                                               |
| T (K)                                      | 100                                                                                                                                                                   |
| Crystal system                             | monoclinic                                                                                                                                                            |
| Space Group                                | P 2 <sub>1</sub> /c                                                                                                                                                   |
| a (Å)                                      | 13.480(8)                                                                                                                                                             |
| b (Å)                                      | 17.680(5)                                                                                                                                                             |
| c (Å)                                      | 22.610(4)                                                                                                                                                             |
| α (°)                                      | 90                                                                                                                                                                    |
| β (°)                                      | 92.636(10)                                                                                                                                                            |
| γ (°)                                      | 90                                                                                                                                                                    |
| V (Å <sup>3</sup> )                        | 5383(4)                                                                                                                                                               |
| Z                                          | 4                                                                                                                                                                     |
| D <sub>calc</sub> (mg/m <sup>3</sup> )     | 1.654                                                                                                                                                                 |
| Absorption coefficient (mm <sup>-1</sup> ) | 1.071                                                                                                                                                                 |
| F (000)                                    | 2688.0                                                                                                                                                                |
| λ (Å)                                      | 0.82602                                                                                                                                                               |
| θ Range data collection (°)                | 1.700 / 26.998                                                                                                                                                        |
| Index ranges                               | -15 ≤ h ≤ 15<br>-21 ≤ k ≤ 21<br>-28 ≤ l ≤ 27                                                                                                                          |
| Reflections collected/unique               | 112992 / 9893                                                                                                                                                         |
| R <sub>int</sub>                           | 0.0408                                                                                                                                                                |
| Observed reflections [I>2σ(I)]             | 8792                                                                                                                                                                  |
| Completeness (%)                           | 87.3                                                                                                                                                                  |
| Maximum / minimum transmission             | 1.000 / 0.873                                                                                                                                                         |
| Data / restraints / parameters             | 9893 / 39 / 748                                                                                                                                                       |
| Goodness-of-fit (GOF) on F <sup>2</sup>    | 1.088                                                                                                                                                                 |
| Final R-index [I>2σ(I)] / all data         | 0.0508 / 0.573                                                                                                                                                        |
| wR index [I>2σ(I)] / all data              | 0.1188 / 0.1224                                                                                                                                                       |
| Largest peak and hole (e Å <sup>-3</sup> ) | 1.280 and -1.444                                                                                                                                                      |
| Weights, w                                 | 1 / [σ <sup>2</sup> (F <sub>o</sub> <sup>2</sup> ) + (0.0240P) <sup>2</sup> ]<br>where P = (F <sub>o</sub> <sup>2</sup> + 2F <sub>c</sub> <sup>2</sup> ) <sup>3</sup> |

**Table S2.** Selected Bond Distances and Angles for [RuRuNCS](PF<sub>6</sub>)<sub>2</sub>CH<sub>3</sub>COCH<sub>3</sub>, and [RuRuCl](PF<sub>6</sub>)<sub>2</sub>.CH<sub>3</sub>OH (extracted from Ref. 1)

| bond length, Å |                                |          |           | bond length, Å |                             |          |           |
|----------------|--------------------------------|----------|-----------|----------------|-----------------------------|----------|-----------|
| Ligand         | Ru <sub>tb</sub><br>moiety     | RuRuNCS  | RuRuCl    | Ligand         | Ru <sub>py</sub><br>moiety  | RuRuNCS  | RuRuCl    |
| CN             | Ru <sub>1tb</sub> -C(2)        | 1.981(5) | 1.970(12) | NC             | Ru <sub>py</sub> -N(6)      | 1.997(5) | 2.028(10) |
|                | Ru <sub>tb</sub> -N(7)         | 2.060(4) | 2.087(8)  | NCS            | Ru <sub>py</sub> -N(1)      | 2.077(5) | -         |
| tpy            | Ru <sub>tb</sub> -N(8)         | 1.949(4) | 1.951(8)  | py1            | Ru <sub>py</sub> -N(2)      | 2.071(4) | 2.085(11) |
|                | Ru <sub>tb</sub> -N(11)        | 2.068(4) | 2.082(9)  | py2            | Ru <sub>py</sub> -N(3)      | 2.082(4) | 2.102(12) |
|                | Ru <sub>tb</sub> -N(9)         | 2.076(4) | 2.122(10) | py3            | Ru <sub>py</sub> -N(4)      | 2.071(5) | 2.098(10) |
| bpy            | Ru <sub>tb</sub> -N(10)        | 2.074(4) | 2.093(9)  | py4            | Ru <sub>py</sub> -N(5)      | 2.089(4) | 2.112(13) |
|                | bridge                         |          |           |                |                             |          |           |
| CN             | C(2)-N(6)                      | 1.173(7) | 1.163(14) | NCS            | N(1)-C(1)                   | 1.11(1)  |           |
|                |                                |          |           |                | C(1)-S(1)                   | 1.653(9) |           |
| angle, degree  |                                |          |           | angle, degree  |                             |          |           |
|                | Ru <sub>tb</sub> (1)-C(2)-N(6) | 175.6(5) | 176.9(9)  |                | Ru <sub>py</sub> -N(6)-C(2) | 179.3(4) | 175.2(9)  |
|                |                                |          |           |                | N(1)-C(1)-S                 | 178.1(7) |           |

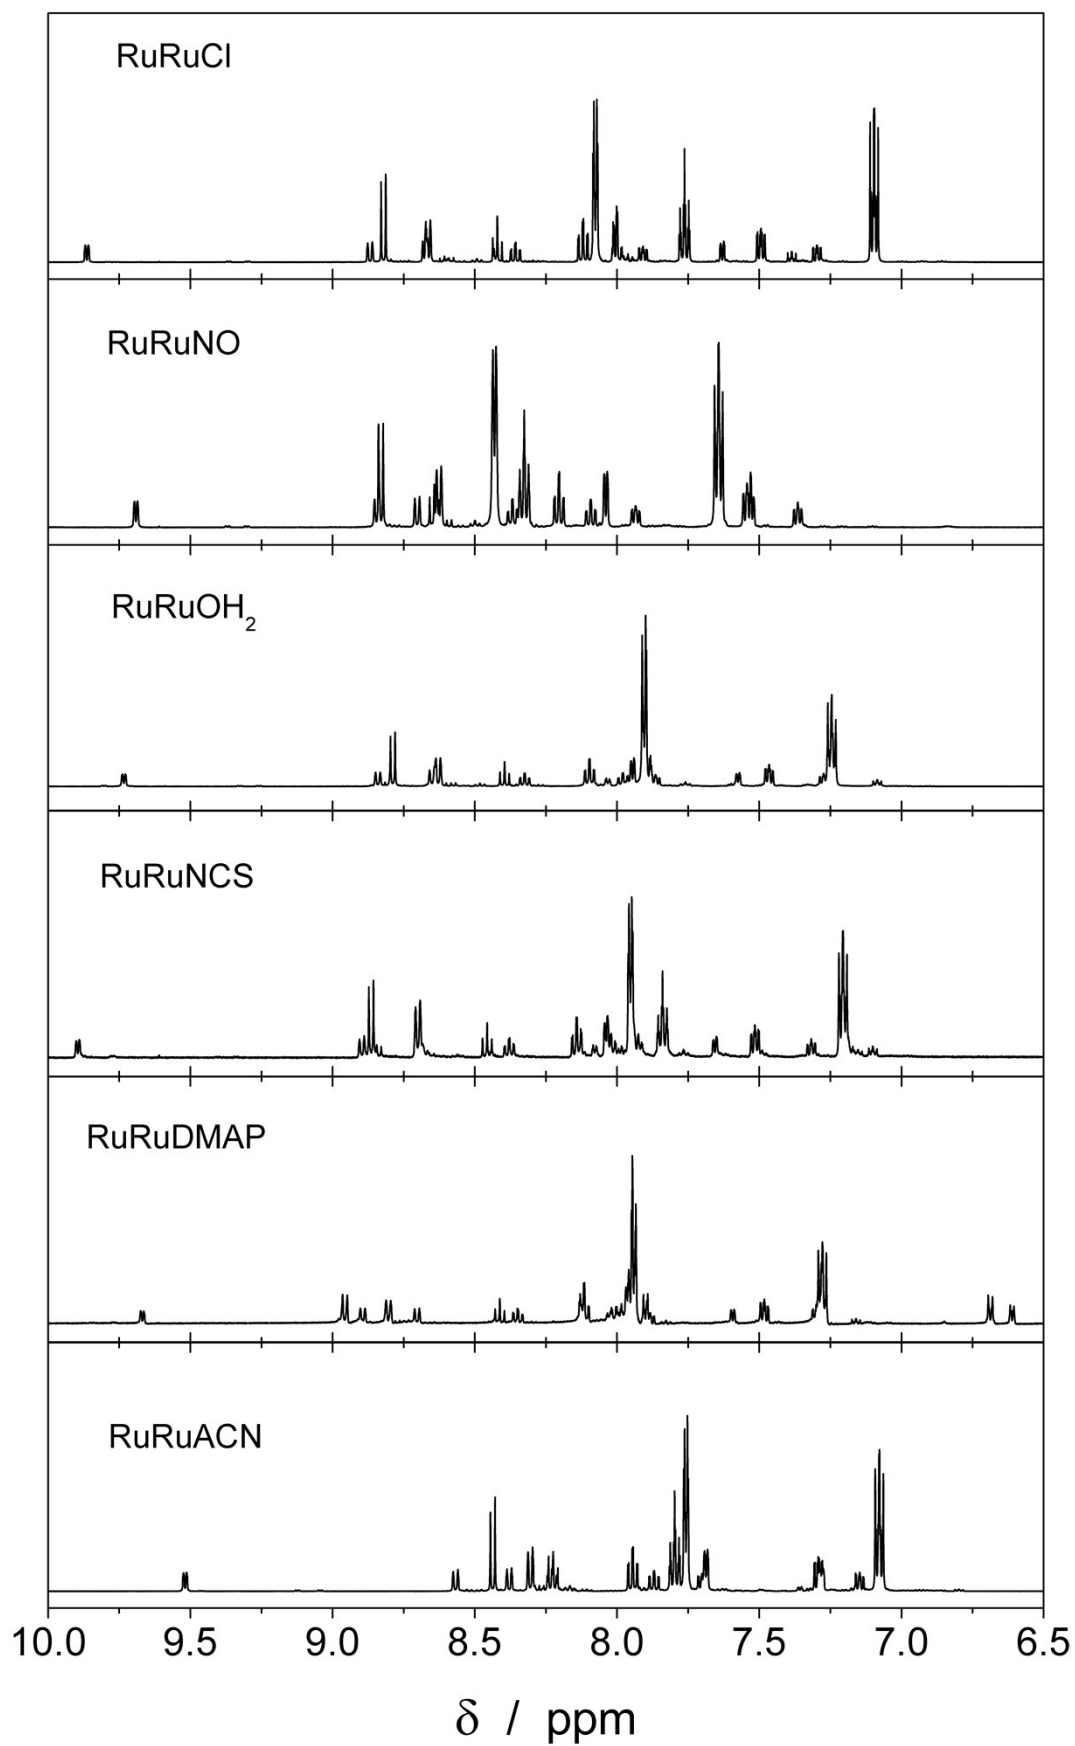

**Figure S1.** 500 MHz <sup>1</sup>H-NMR spectra of complexes **RuRuCl** (Acetone-D<sub>6</sub>), **RuRuNO** (Acetone-D<sub>6</sub>), **RuRuOH<sub>2</sub>** (Acetone-D<sub>6</sub>), **RuRuNCS** (Acetone-D<sub>6</sub>), **RuRuDMAP** (Acetone-D<sub>6</sub>) and **RuRuACN** (Acetonitrile-D<sub>3</sub>), from top to bottom.

## Cyclic Voltammograms

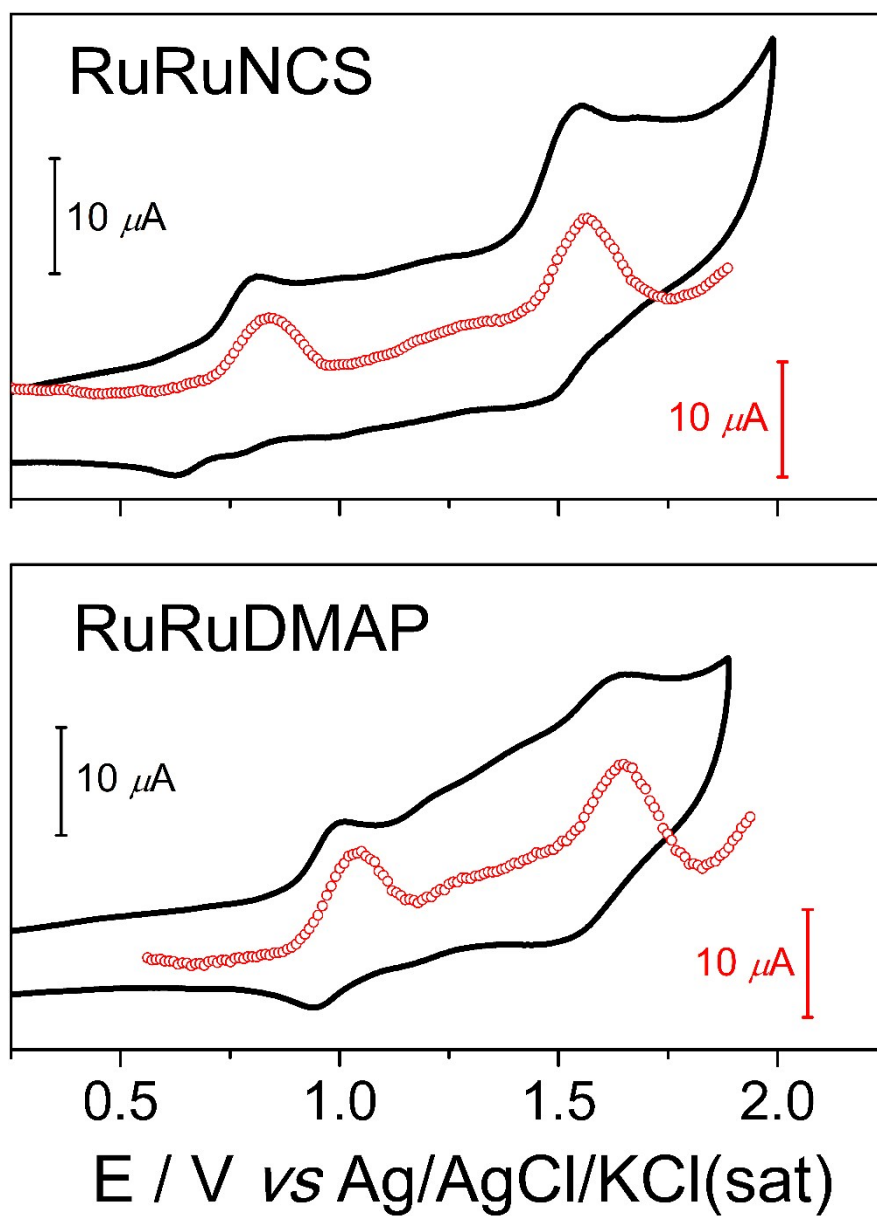

**Figure S2.** Cyclic voltammograms (solid line) and square wave voltammograms (voided circles) for the **RuRuNCS** y **RuRuDMAP** complexes in acetonitrile/0.1 M [TBA]PF<sub>6</sub>.

## VIS-NIR Spectroelectrochemistry

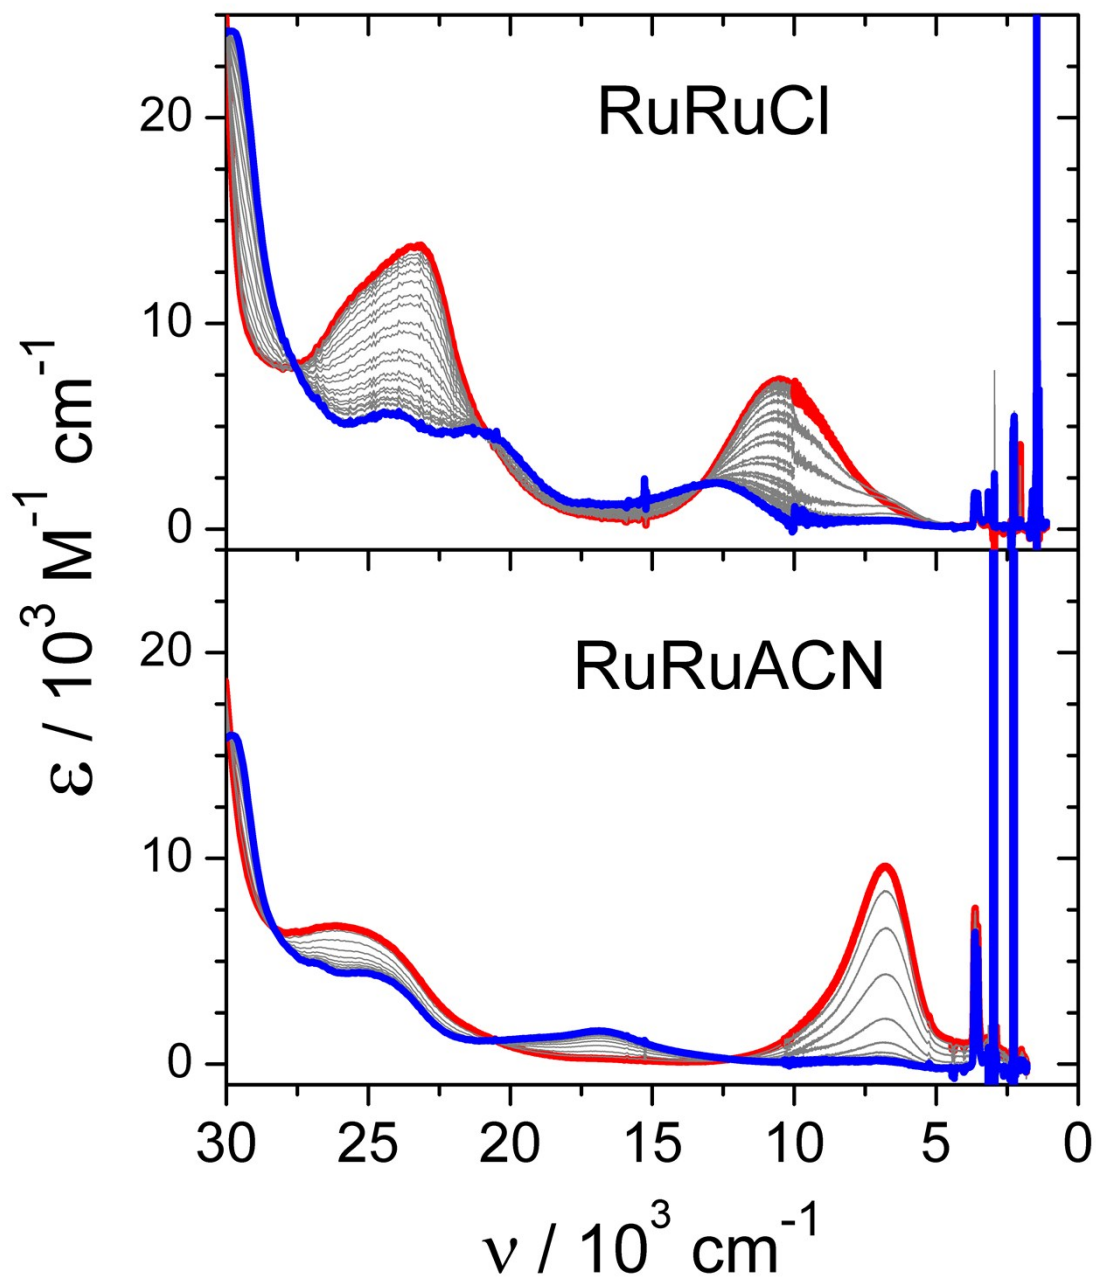

**Figure S3.** Vis-NIR spectroelectrochemistry for the **RuRuL** complexes in acetonitrile/0.1 M [TBA]PF<sub>6</sub>, during the second oxidation processes. The spectra of the [II,III] (red), and [III,III] (blue) species are highlighted.

## Solvent dependence of NIR bands

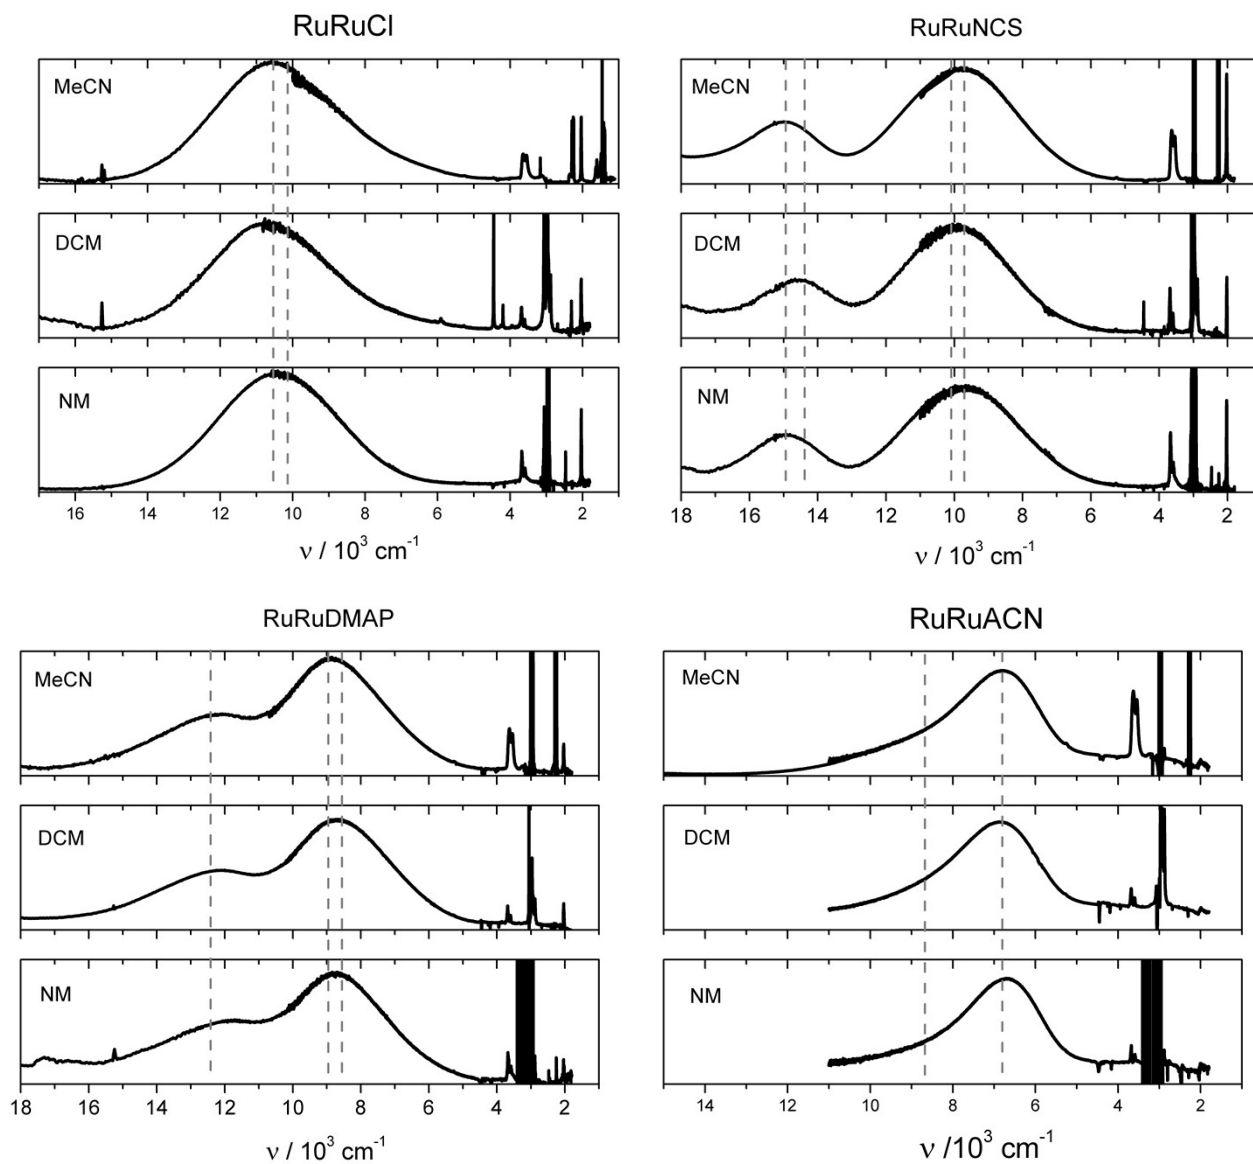

**Figure S4.** NIR absorption spectra for the **RuRuL** complexes in different solvents: acetonitrile (MeCN), dichloromethane (DCM) and nitromethane (NM).

## IR Spectroelectrochemistry

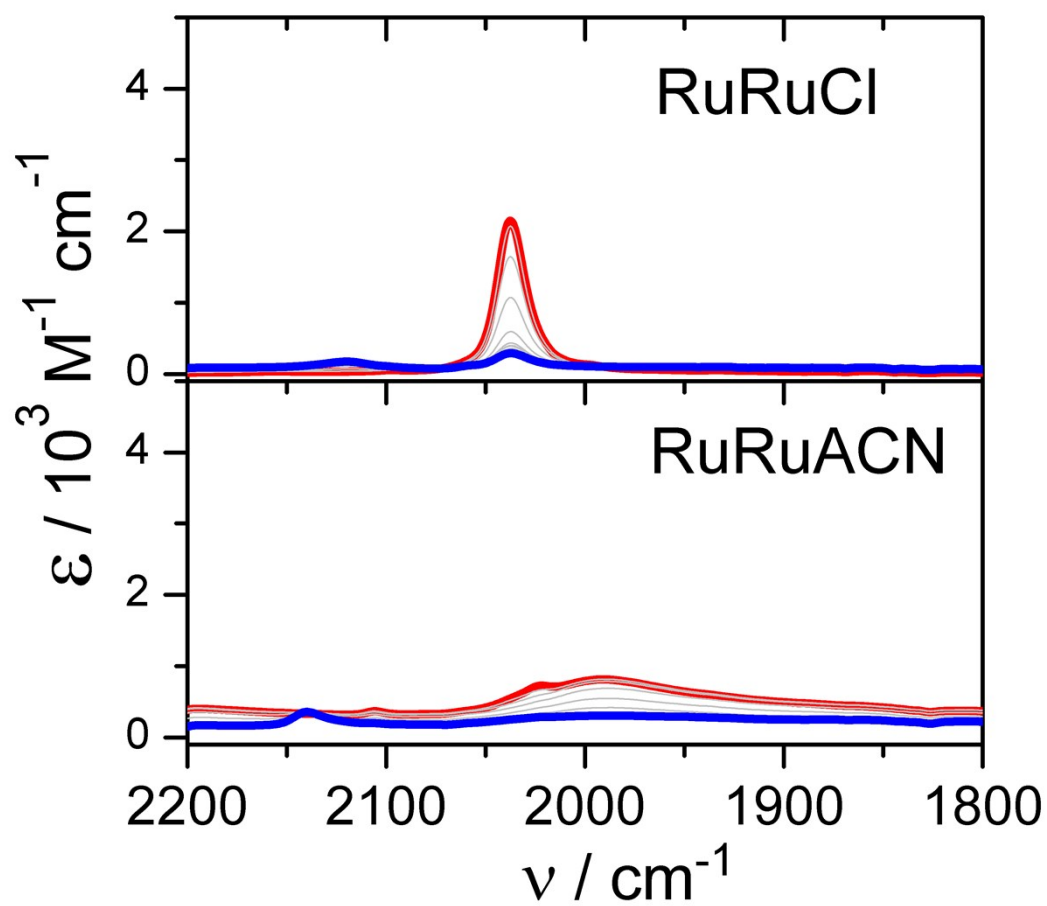

**Figure S5.** IR spectroelectrochemistry for the **RuRuL** complexes in acetonitrile/0.1 M [TBA]PF<sub>6</sub>, during the second oxidation processes. The spectra of the [II,III] (red), and [III,III] (blue) species are highlighted.



### DFT Calculations

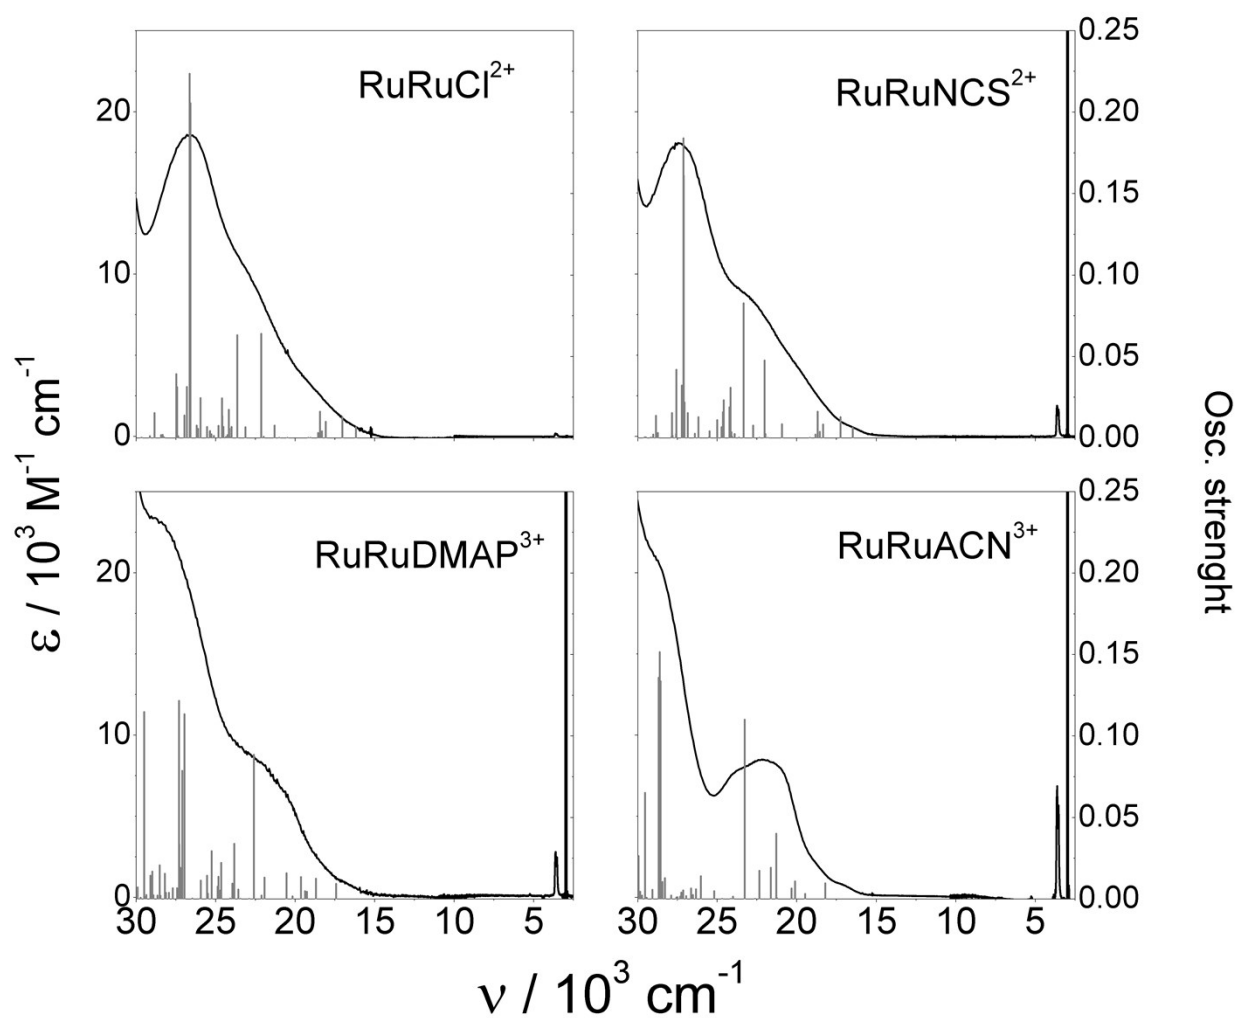

**Figure S6.** Comparison of the experimental vis-NIR spectra of the **RuRuL** complexes species in acetonitrile/0.1 M [TBA]PF<sub>6</sub> and the energy of the transitions calculated by (TD)DFT calculations (bars).

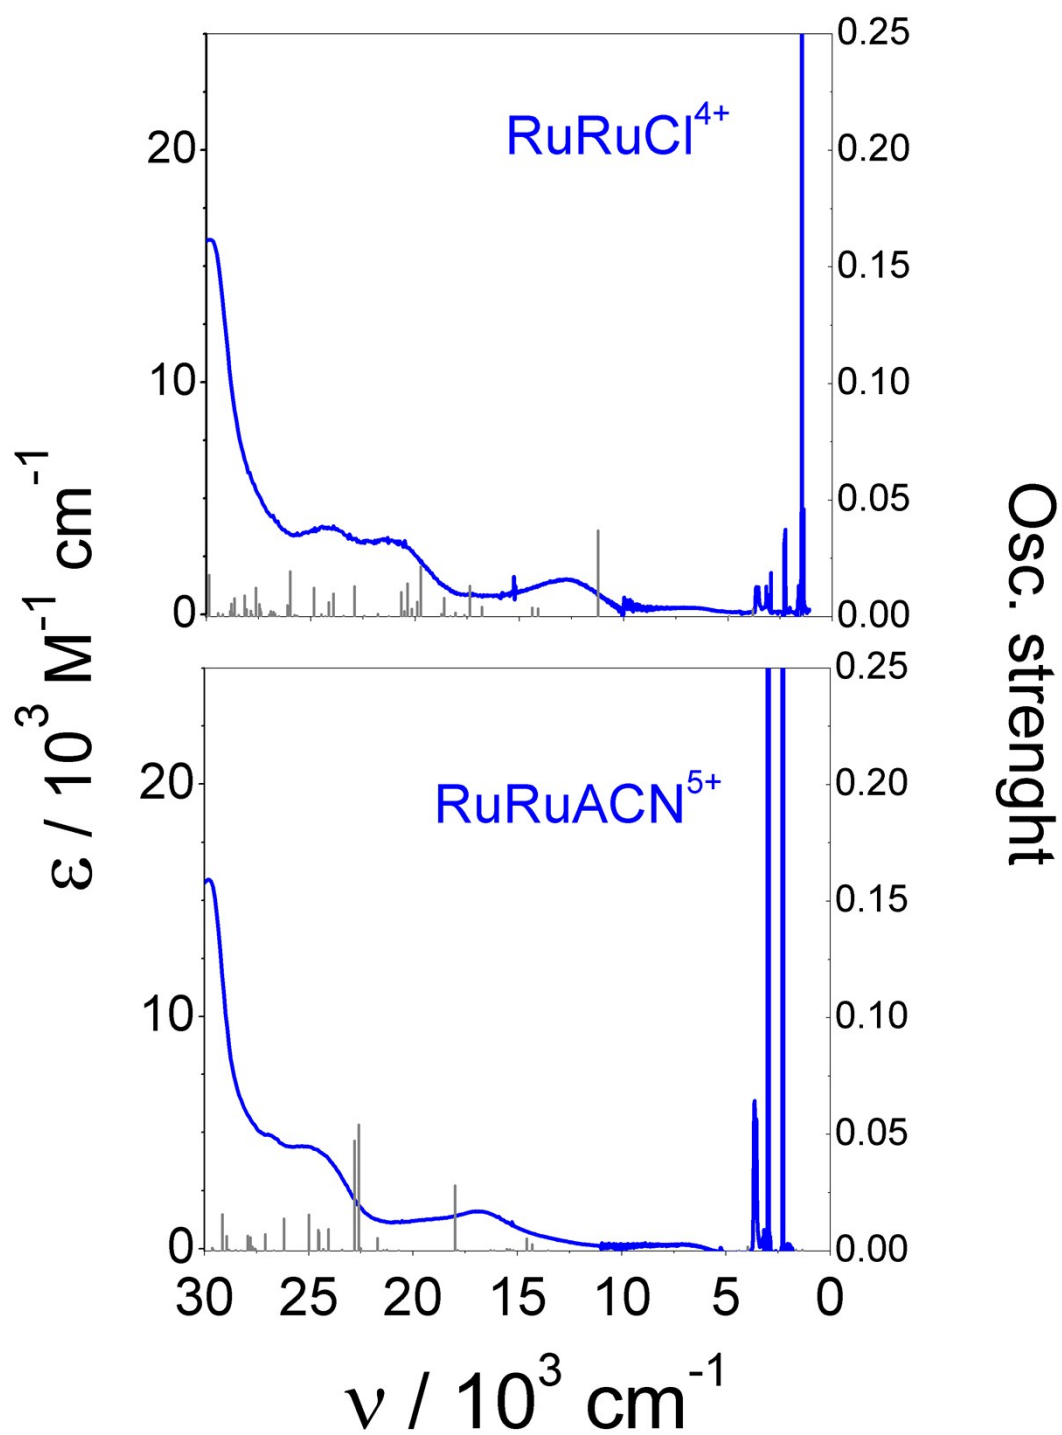

**Figure S7.** Comparison of the experimental vis-NIR spectra of the **RuRuL** complexes species in acetonitrile/0.1 M [TBA]PF<sub>6</sub> and the energy of the transitions calculated by (TD)DFT calculations (bars).

**Table S3-A.** Selected electronic transitions ( $f > 0.05$ ) for the singlet **RuRuACN**<sup>3+</sup> ion calculated in MeCN

| No. | Energy (cm <sup>-1</sup> ) | Osc. Strength | Major contribs                                          | Assignment                                                                                                      |
|-----|----------------------------|---------------|---------------------------------------------------------|-----------------------------------------------------------------------------------------------------------------|
| 20  | 23285                      | 0.1101        | H-3 → L+1 (23%)<br>H-3 → L+2 (49%)<br>HOMO → L+2 (12%)  | $d\pi_{xy}(\text{Ru}_{pp}), d\pi_{xz}(\text{Ru}_{py}) \rightarrow \pi^*(\text{tpy}, \text{bpy})$                |
| 76  | 28580                      | 0.1336        | H-2 → L+6 (24%)<br>HOMO → L+7 (37%)<br>HOMO → L+8 (11%) | $d\pi_{xy}(\text{Ru}_{py}), d\pi_{xz}(\text{Ru}_{py}, \text{Ru}_{pp}) \rightarrow \pi^*(\text{py}, \text{tpy})$ |
| 77  | 28632                      | 0.1516        | H-2 → L+5 (37%)<br>H-2 → L+6 (17%)<br>HOMO → L+8 (21%)  | $d\pi_{xy}(\text{Ru}_{py}), d\pi_{xz}(\text{Ru}_{pp}) \rightarrow \pi^*(\text{py})$                             |
| 78  | 28687                      | 0.1359        | H-2 → L+5 (21%)<br>H-2 → L+6 (15%)<br>HOMO → L+8 (16%)  | $d\pi_{xy}(\text{Ru}_{py}), d\pi_{xz}(\text{Ru}_{pp}) \rightarrow \pi^*(\text{py}, \text{tpy})$                 |

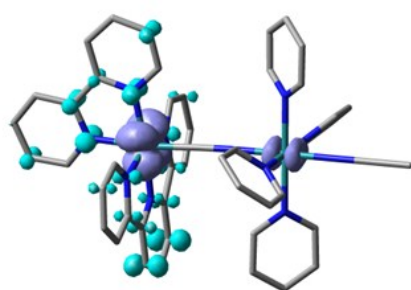

**Electronic Transition #20**  
23285 cm<sup>-1</sup>  $f=0.1101$

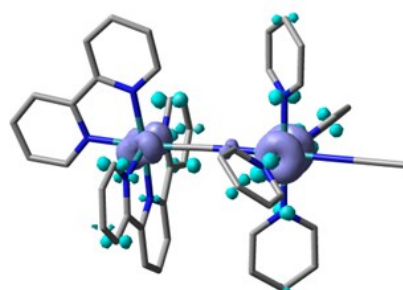

**Electronic Transition #76**  
28580 cm<sup>-1</sup>  $f=0.1336$

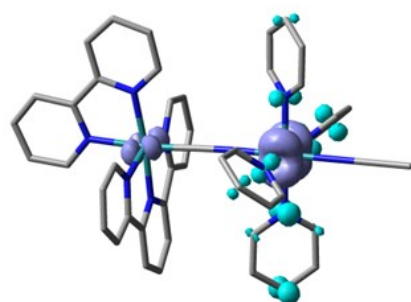

**Electronic Transition #77**  
28632 cm<sup>-1</sup>  $f=0.1516$

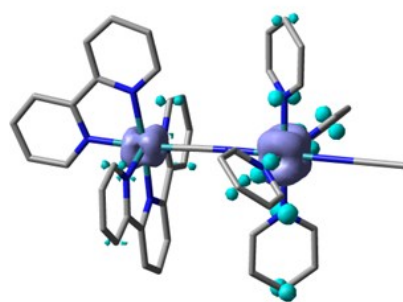

**Electronic Transition #78**  
28687 cm<sup>-1</sup>  $f=0.1359$

**Figure S8-A.** Electron density difference maps of the selected energy electronic transitions for the singlet **RuRuACN**<sup>3+</sup> ion. Purple indicates a decrease in charge density, while cyan indicates an increase.

**Table S3-B.** Selected electronic transitions ( $f > 0.05$ ) for the singlet **RuRuDMAP<sup>3+</sup>** ion calculated in MeCN.

| No. | Energy (cm <sup>-1</sup> ) | Osc. Strength | Major contribs                                                                               | Assignment                                                                    |
|-----|----------------------------|---------------|----------------------------------------------------------------------------------------------|-------------------------------------------------------------------------------|
| 25  | 22612                      | 0.0885        | H-3 → L+1 (33%)<br>H-3 → L+2 (40%)                                                           | $d\pi_{xy}(\text{Ru}_{pp}) \rightarrow \pi^*(\text{tpy, bpy})$                |
| 71  | 26976                      | 0.1135        | H-2 → L+4 (39%)<br>H-2 → L+5 (28%)<br>H-2 → L+6 (11%)                                        | $d\pi_{xy}(\text{Ru}_{py}) \rightarrow \pi^*(py)$                             |
| 72  | 27100                      | 0.0787        | H-2 → L+4 (20%)<br>H-2 → L+5 (36%)<br>H-2 → L+7 (21%)                                        | $d\pi_{xy}(\text{Ru}_{py}) \rightarrow \pi^*(py)$                             |
| 77  | 27323                      | 0.1216        | H-6 → LUMO (15%)<br>H-2 → L+3 (12%)<br>H-2 → L+5 (11%)<br>H-2 → L+6 (16%)<br>H-2 → L+7 (18%) | $d\pi_{xy}(\text{Ru}_{py}) \rightarrow \pi^*(py)$                             |
| 106 | 29511                      | 0.1148        | H-2 → L+22 (13%)<br>H-1 → L+10 (24%)<br>HOMO → L+12 (18%)                                    | $d\pi_{xy}(\text{Ru}_{py}, \text{Ru}_{py}) \rightarrow \pi^*(\text{bpy, py})$ |

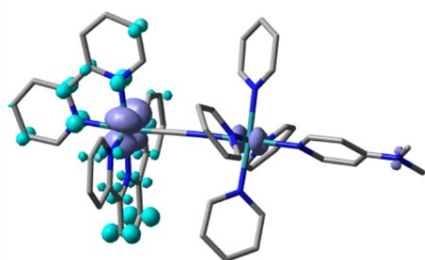

**Electronic Transition #25**  
22612 cm<sup>-1</sup>  $f=0.0885$

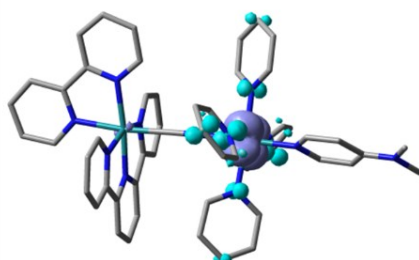

**Electronic Transition #71**  
26976 cm<sup>-1</sup>  $f=0.1135$

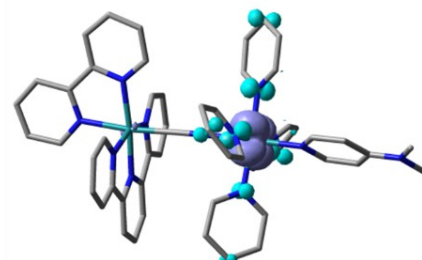

**Electronic Transition #72**  
27100 cm<sup>-1</sup>  $f=0.0787$

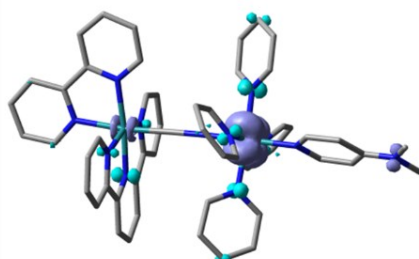

**Electronic Transition #77**  
27323 cm<sup>-1</sup>  $f=0.1216$

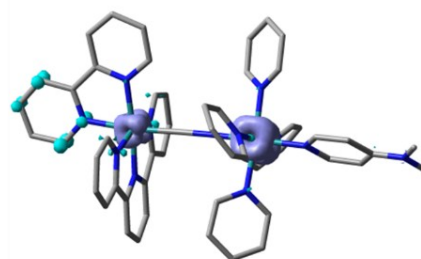

**Electronic Transition #106**  
29511 cm<sup>-1</sup>  $f=0.1148$

**Figure S8-B.** Electron density difference maps of the selected energy electronic transitions for the singlet **RuRuDMAP<sup>3+</sup>** ion. Purple indicates a decrease in charge density, while cyan indicates an increase.

**Table S3-C.** Selected electronic transitions ( $f > 0.05$ ) for the singlet **RuRuNCS<sup>2+</sup>** ion calculated in MeCN.

| No. | Energy (cm <sup>-1</sup> ) | Osc. Strength | Major contribs                     | Assignment                                                            |
|-----|----------------------------|---------------|------------------------------------|-----------------------------------------------------------------------|
| 37  | 23345                      | 0.0828        | H-4 → L+1 (78%)                    | $d\pi_{xy}(\text{Ru}_{pp}) \rightarrow \pi^*(\text{tpy}, \text{bpy})$ |
| 79  | 27114                      | 0.1611        | H-2 → L+6 (46%)<br>H-2 → L+7 (17%) | $d\pi_{xy}(\text{Ru}_{py}) \rightarrow \pi^*(\text{py})$              |
| 80  | 27132                      | 0.1840        | H-2 → L+6 (28%)<br>H-2 → L+7 (43%) | $d\pi_{xy}(\text{Ru}_{py}) \rightarrow \pi^*(\text{py})$              |

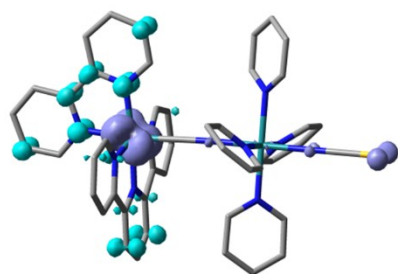

**Electronic Transition #37**  
23345 cm<sup>-1</sup>  $f=0.0828$

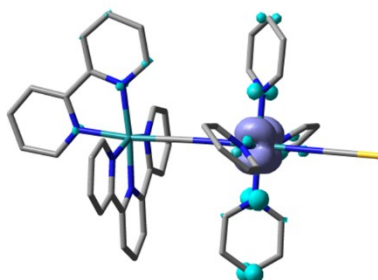

**Electronic Transition #79**  
27114 cm<sup>-1</sup>  $f=0.1611$

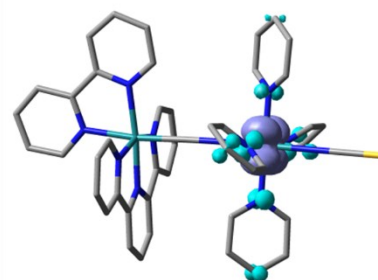

**Electronic Transition #80**  
27132 cm<sup>-1</sup>  $f=0.1840$

**Figure S8-C.** Electron density difference maps of the selected energy electronic transitions for the singlet **RuRuNCS<sup>2+</sup>** ion. Purple indicates a decrease in charge density, while cyan indicates an increase.

**Table S3-D.** Selected electronic transitions ( $f > 0.05$ ) for the singlet  $\text{RuRuCl}^{2+}$  ion calculated in MeCN.

| No. | Energy ( $\text{cm}^{-1}$ ) | Osc. Strength | Major contribs                                                                            | Assignment                                                     |
|-----|-----------------------------|---------------|-------------------------------------------------------------------------------------------|----------------------------------------------------------------|
| 31  | 22144                       | 0.0639        | H-3 $\rightarrow$ L+1 (63%)<br>H-3 $\rightarrow$ L+2 (23%)                                | $d\pi_{xy}(\text{Ru}_{pp}) \rightarrow \pi^*(\text{tpy, bpy})$ |
| 39  | 23649                       | 0.0631        | H-4 $\rightarrow$ L+1 (90%)                                                               | $d\pi_{yz}(\text{Ru}_{pp}) \rightarrow \pi^*(\text{tpy, bpy})$ |
| 77  | 26596                       | 0.2056        | H-2 $\rightarrow$ L+6 (14%)<br>H-2 $\rightarrow$ L+7 (32%)<br>H-2 $\rightarrow$ L+8 (15%) | $d\pi_{xy}(\text{Ru}_{py}) \rightarrow \pi^*(\text{py})$       |
| 78  | 26648                       | 0.2236        | H-2 $\rightarrow$ L+6 (32%)<br>H-2 $\rightarrow$ L+7 (20%)<br>H-2 $\rightarrow$ L+9 (15%) | $d\pi_{xy}(\text{Ru}_{py}) \rightarrow \pi^*(\text{py})$       |

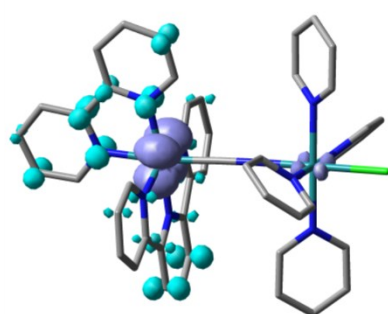

Electronic Transition #31  
22144  $\text{cm}^{-1}$   $f=0.0639$

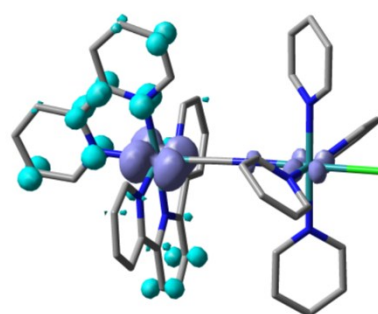

Electronic Transition #39  
23649  $\text{cm}^{-1}$   $f=0.0631$

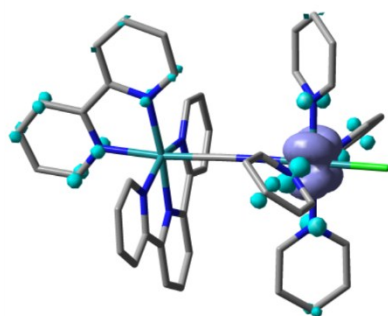

Electronic Transition #77  
26596  $\text{cm}^{-1}$   $f=0.2056$

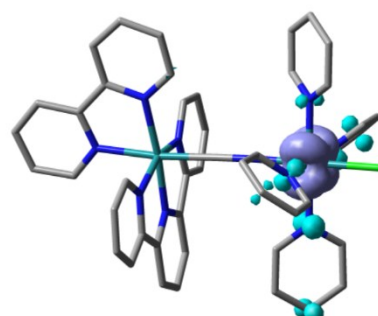

Electronic Transition #78  
26648  $\text{cm}^{-1}$   $f=0.2236$

**Figure S8-D.** Electron density difference maps of the selected energy electronic transitions for the singlet  $\text{RuRuCl}^{2+}$  ion. Purple indicates a decrease in charge density, while cyan indicates an increase.

**Table S4-A.** Selected electronic transitions for the doublet **RuRuACN<sup>4+</sup>** ion calculated in MeCN.

| No. | Energy (cm <sup>-1</sup> ) | Osc. Strength | Major contribs                                                                                | Assignment                                                                                                          |
|-----|----------------------------|---------------|-----------------------------------------------------------------------------------------------|---------------------------------------------------------------------------------------------------------------------|
| 1   | 932                        | 0.0000        | H-1 $\beta$ $\rightarrow$ LUMO $\beta$ (100%)                                                 | d $\pi_{xz}$ (Ru <sub>pp</sub> ,Ru <sub>py</sub> ) $\rightarrow$ d $\pi_{yz}$ (Ru <sub>pp</sub> ,Ru <sub>py</sub> ) |
| 2   | 3147                       | 0.0002        | H-2 $\beta$ $\rightarrow$ LUMO $\beta$ (98%)                                                  | d $\pi_{xy}$ (Ru <sub>py</sub> ) $\rightarrow$ d $\pi_{yz}$ (Ru <sub>pp</sub> ,Ru <sub>py</sub> )                   |
| 3   | 3655                       | 0.0185        | H-3 $\beta$ $\rightarrow$ LUMO $\beta$ (64%)<br>HOMO $\beta$ $\rightarrow$ LUMO $\beta$ (34%) | d $\pi_{xy}$ (Ru <sub>pp</sub> ) $\rightarrow$ d $\pi_{yz}$ (Ru <sub>pp</sub> ,Ru <sub>py</sub> )                   |
| 4   | 6932                       | 0.2353        | H-3 $\beta$ $\rightarrow$ LUMO $\beta$ (33%)<br>HOMO $\beta$ $\rightarrow$ LUMO $\beta$ (64%) | d $\pi_{xy}$ (Ru <sub>py</sub> ) $\rightarrow$ d $\pi_{yz}$ (Ru <sub>pp</sub> ,Ru <sub>py</sub> )                   |
| 5   | 7411                       | 0.0005        | H-4 $\beta$ $\rightarrow$ LUMO $\beta$ (96%)                                                  | d $\pi_{xz}$ (Ru <sub>pp</sub> ,Ru <sub>py</sub> ) $\rightarrow$ d $\pi_{yz}$ (Ru <sub>pp</sub> ,Ru <sub>py</sub> ) |
| 6   | 14950                      | 0.0050        | H-5 $\beta$ $\rightarrow$ LUMO $\beta$ (91%)                                                  | $\pi$ (tpy) $\rightarrow$ d $\pi_{yz}$ (Ru <sub>pp</sub> ,Ru <sub>py</sub> )                                        |
| 7   | 15629                      | 0.0009        | H-6 $\beta$ $\rightarrow$ LUMO $\beta$ (92%)                                                  | $\pi$ (bpy) $\rightarrow$ d $\pi_{yz}$ (Ru <sub>pp</sub> ,Ru <sub>py</sub> )                                        |

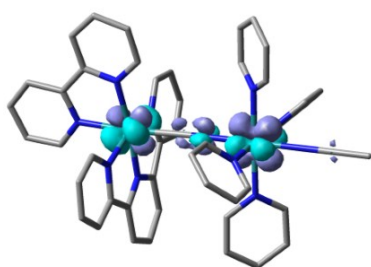

Electronic Transition #1  
932 cm<sup>-1</sup> f=0.0000

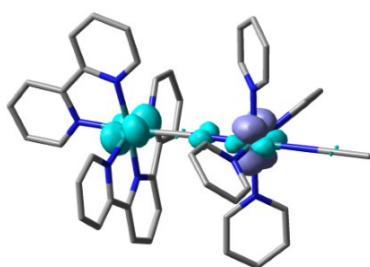

Electronic Transition #2  
3147 cm<sup>-1</sup> f=0.0002

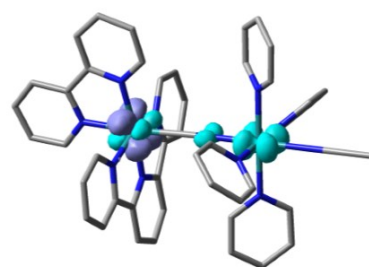

Electronic Transition #3  
3655 cm<sup>-1</sup> f=0.0185

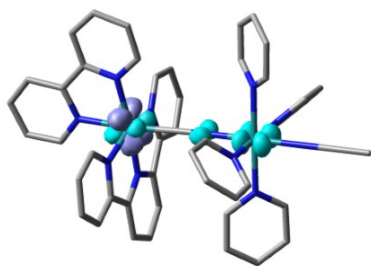

Electronic Transition #4  
6932 cm<sup>-1</sup> f=0.2352

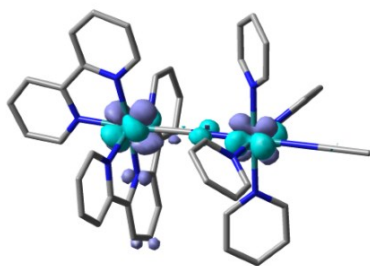

Electronic Transition #5  
7411 cm<sup>-1</sup> f=0.0005

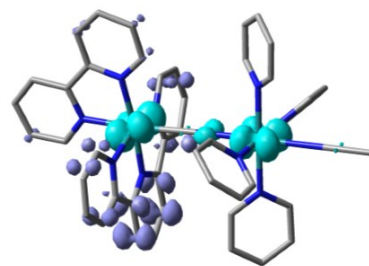

Electronic Transition #6  
14950 cm<sup>-1</sup> f=0.0050

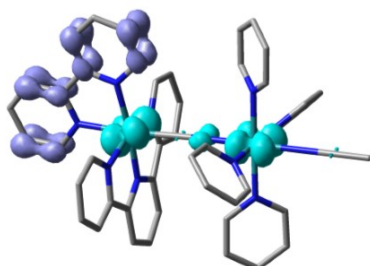

Electronic Transition #7  
15629 cm<sup>-1</sup> f=0.0009

**Figure S9-A.** Electron density difference maps of the lowest energy electronic transitions for doublet **RuRuACN<sup>4+</sup>** ion. Purple indicates a decrease in charge density, while cyan indicates an increase.

**Table S4-B.** Selected electronic transitions for the doublet **RuRuDMAP<sup>4+</sup>** ion calculated in MeCN.

| No. | Energy (cm <sup>-1</sup> ) | Osc. Strength | Major contribs                                                  | Assignment                                                                                                        |
|-----|----------------------------|---------------|-----------------------------------------------------------------|-------------------------------------------------------------------------------------------------------------------|
| 1   | 2099                       | 0.0006        | H-5β → LUMOβ (40%)<br>H-2β → LUMOβ (30%)<br>HOMOβ → LUMOβ (21%) | dπ <sub>xz</sub> (Ru <sub>pp</sub> , Ru <sub>py</sub> ) → dπ <sub>yz</sub> (Ru <sub>py</sub> )                    |
| 2   | 3735                       | 0.0004        | H-4β → LUMOβ (96%)                                              | dπ <sub>xy</sub> (Ru <sub>py</sub> ) → dπ <sub>yz</sub> (Ru <sub>pp</sub> , Ru <sub>py</sub> )                    |
| 3   | 6642                       | 0.0236        | H-1β → LUMOβ (53%)<br>HOMOβ → LUMOβ (42%)                       | dπ <sub>xy</sub> (Ru <sub>pp</sub> ), dπ <sub>yz</sub> (Ru <sub>pp</sub> ) → dπ <sub>yz</sub> (Ru <sub>py</sub> ) |
| 4   | 7907                       | 0.1896        | H-2β → LUMOβ (11%)<br>H-1β → LUMOβ (42%)<br>HOMOβ → LUMOβ (34%) | dπ <sub>xy</sub> (Ru <sub>pp</sub> ), dπ <sub>yz</sub> (Ru <sub>pp</sub> ) → dπ <sub>yz</sub> (Ru <sub>py</sub> ) |
| 5   | 8990                       | 0.0745        | H-5β → LUMOβ (38%)<br>H-2β → LUMOβ (57%)                        | dπ <sub>xz</sub> (Ru <sub>pp</sub> , Ru <sub>py</sub> ) → dπ <sub>yz</sub> (Ru <sub>py</sub> , Ru <sub>pp</sub> ) |
| 6   | 11108                      | 0.0959        | H-3β → LUMOβ (91%)                                              | π(DMAP) → dπ <sub>yz</sub> (Ru <sub>py</sub> )                                                                    |

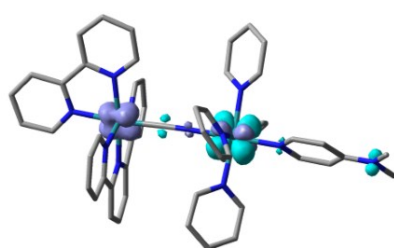

Electronic Transition #1  
2099 cm<sup>-1</sup> f=0.0006

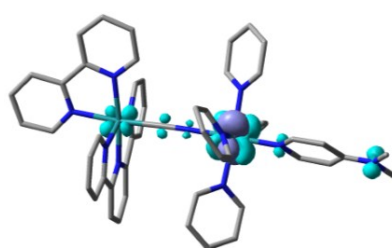

Electronic Transition #2  
3735 cm<sup>-1</sup> f=0.0004

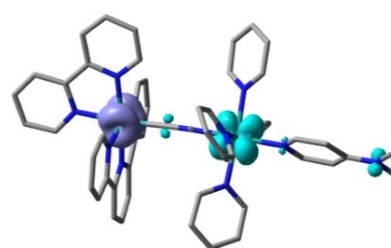

Electronic Transition #3  
6642 cm<sup>-1</sup> f=0.0236

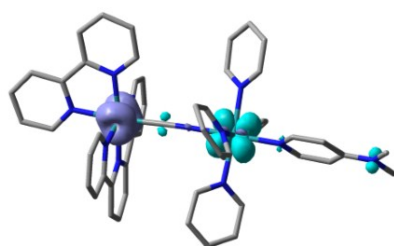

Electronic Transition #4  
7907 cm<sup>-1</sup> f=0.1896

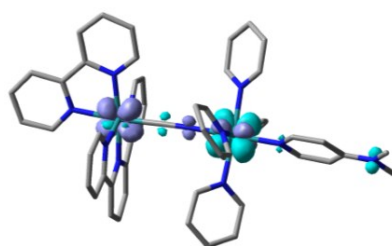

Electronic Transition #5  
8990 cm<sup>-1</sup> f=0.0745

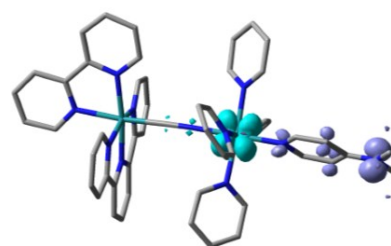

Electronic Transition #6  
11108 cm<sup>-1</sup> f=0.0959

**Figure S9-B.** Electron density difference maps of the lowest energy electronic transitions for doublet **RuRuDMAP<sup>4+</sup>** ion. Purple indicates a decrease in charge density, while cyan indicates an increase.



**Table S4-C.** Selected electronic transitions for the doublet **RuRuNCS<sup>3+</sup>** ion calculated in MeCN.

| No. | Energy (cm <sup>-1</sup> ) | Osc. Strength | Major contribs                                                  | Assignment                                                                                                      |
|-----|----------------------------|---------------|-----------------------------------------------------------------|-----------------------------------------------------------------------------------------------------------------|
| 1   | 592                        | 0.0000        | H-8β → LUMOβ (10%)<br>H-1β → LUMOβ (12%)<br>HOMOβ → LUMOβ (71%) | dπ <sub>xz</sub> (Ru <sub>pp</sub> ,Ru <sub>py</sub> ) → dπ <sub>yz</sub> (Ru <sub>py</sub> ,Ru <sub>pp</sub> ) |
| 2   | 3751                       | 0.0004        | H-5β → LUMOβ (20%)<br>H-4β → LUMOβ (76%)                        | dπ <sub>xy</sub> (Ru <sub>py</sub> ) → dπ <sub>yz</sub> (Ru <sub>py</sub> ,Ru <sub>pp</sub> )                   |
| 3   | 7641                       | 0.0349        | H-2β → LUMOβ (27%)<br>H-1β → LUMOβ (60%)<br>HOMOβ → LUMOβ (11%) | dπ <sub>xy</sub> (Ru <sub>pp</sub> ) → dπ <sub>yz</sub> (Ru <sub>py</sub> )                                     |
| 4   | 8794                       | 0.1190        | H-3β → LUMOβ (16%)<br>H-2β → LUMOβ (63%)<br>H-1β → LUMOβ (11%)  | dπ <sub>xy</sub> (Ru <sub>pp</sub> ) → dπ <sub>yz</sub> (Ru <sub>py</sub> )                                     |
| 5   | 9421                       | 0.0655        | H-3β → LUMOβ (75%)<br>H-1β → LUMOβ (13%)                        | dπ <sub>xz</sub> (Ru <sub>pp</sub> ) → dπ <sub>yz</sub> (Ru <sub>py</sub> )                                     |
| 6   | 13157                      | 0.0000        | H-8β → LUMOβ (85%)                                              | π(NCS) → dπ <sub>yz</sub> (Ru <sub>py</sub> ,Ru <sub>pp</sub> )                                                 |
| 7   | 13774                      | 0.1148        | H-5β → LUMOβ (76%)<br>H-4β → LUMOβ (20%)                        | π(NCS) → dπ <sub>yz</sub> (Ru <sub>py</sub> ,Ru <sub>pp</sub> )                                                 |

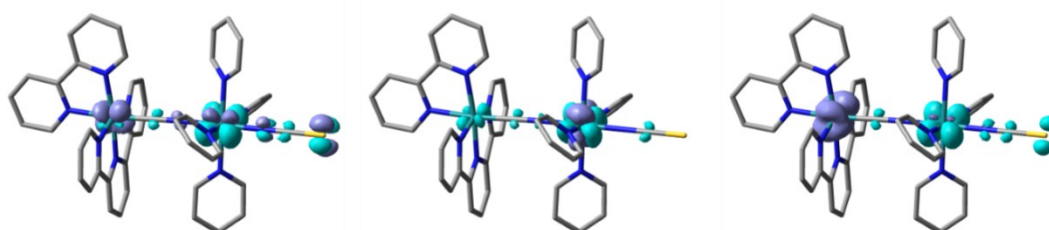

Electronic Transition #1  
592 cm<sup>-1</sup> f=0.0000

Electronic Transition #2  
3751 cm<sup>-1</sup> f=0.0004

Electronic Transition #3  
7641 cm<sup>-1</sup> f=0.0349

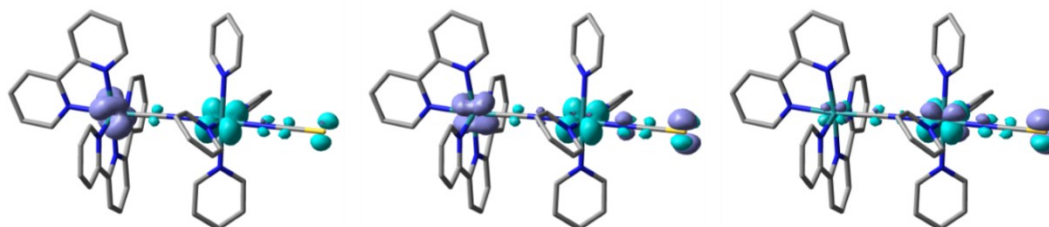

Electronic Transition #4  
8794 cm<sup>-1</sup> f=0.1190

Electronic Transition #5  
9421 cm<sup>-1</sup> f=0.0655

Electronic Transition #6  
13157 cm<sup>-1</sup> f=0.0000

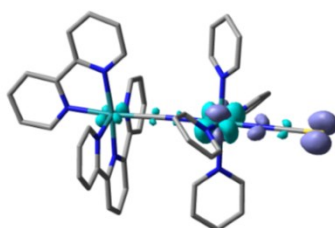

Electronic Transition #7  
13774 cm<sup>-1</sup> f=0.1148

**Figure S9-C.** Electron density difference maps of the lowest energy electronic transitions for doublet **RuRuNCS<sup>3+</sup>** ion. Purple indicates a decrease in charge density, while cyan indicates an increase.

**Table S4-D.** Selected electronic transitions for the doublet  $\text{RuRuCl}^{3+}$  ion calculated in MeCN.

| No. | Energy ( $\text{cm}^{-1}$ ) | Osc. Strength | Major contribs                                                                                                                                                                                | Assignment                                                                                   |
|-----|-----------------------------|---------------|-----------------------------------------------------------------------------------------------------------------------------------------------------------------------------------------------|----------------------------------------------------------------------------------------------|
| 1   | 771                         | 0.0000        | H-3 $\beta$ $\rightarrow$ LUMO $\beta$ (33%)<br>H-1 $\beta$ $\rightarrow$ LUMO $\beta$ (10%)<br>HOMO $\beta$ $\rightarrow$ LUMO $\beta$ (44%)                                                 | $d\pi_{yz}(\text{Ru}_{pp}, \text{Ru}_{py}) \rightarrow d\pi_{xz}(\text{Ru}_{py})$            |
| 2   | 2622                        | 0.0004        | H-4 $\beta$ $\rightarrow$ LUMO $\beta$ (97%)                                                                                                                                                  | $d\pi_{xy}(\text{Ru}_{py}) \rightarrow d\pi_{xz}(\text{Ru}_{py}, \text{Ru}_{pp})$            |
| 3   | 7998                        | 0.0116        | H-1 $\beta$ $\rightarrow$ LUMO $\beta$ (68%)<br>HOMO $\beta$ $\rightarrow$ LUMO $\beta$ (28%)                                                                                                 | $d\pi_{xy}(\text{Ru}_{pp}) \rightarrow d\pi_{xz}(\text{Ru}_{py})$                            |
| 4   | 9382                        | 0.0761        | H-3 $\beta$ $\rightarrow$ LUMO $\beta$ (20%)<br>H-2 $\beta$ $\rightarrow$ LUMO $\beta$ (39%)<br>H-1 $\beta$ $\rightarrow$ LUMO $\beta$ (14%)<br>HOMO $\beta$ $\rightarrow$ LUMO $\beta$ (24%) | $d\pi_{xz}(\text{Ru}_{pp}), d\pi_{yz}(\text{Ru}_{pp}) \rightarrow d\pi_{xz}(\text{Ru}_{py})$ |
| 5   | 10291                       | 0.0681        | H-3 $\beta$ $\rightarrow$ LUMO $\beta$ (38%)<br>H-2 $\beta$ $\rightarrow$ LUMO $\beta$ (50%)                                                                                                  | $d\pi_{xz}(\text{Ru}_{pp}) \rightarrow d\pi_{xz}(\text{Ru}_{py})$                            |
| 6   | 18374                       | 0.0021        | H-5 $\beta$ $\rightarrow$ LUMO $\beta$ (67%)                                                                                                                                                  | $\pi(\text{trpy}) \rightarrow d\pi_{xz}(\text{Ru}_{py}, \text{Ru}_{pp})$                     |
| 8   | 18994                       | 0.0105        | H-7 $\beta$ $\rightarrow$ LUMO $\beta$ (80%)                                                                                                                                                  | $\pi(\text{Cl}) \rightarrow d\pi_{xz}(\text{Ru}_{py}, \text{Ru}_{pp})$                       |

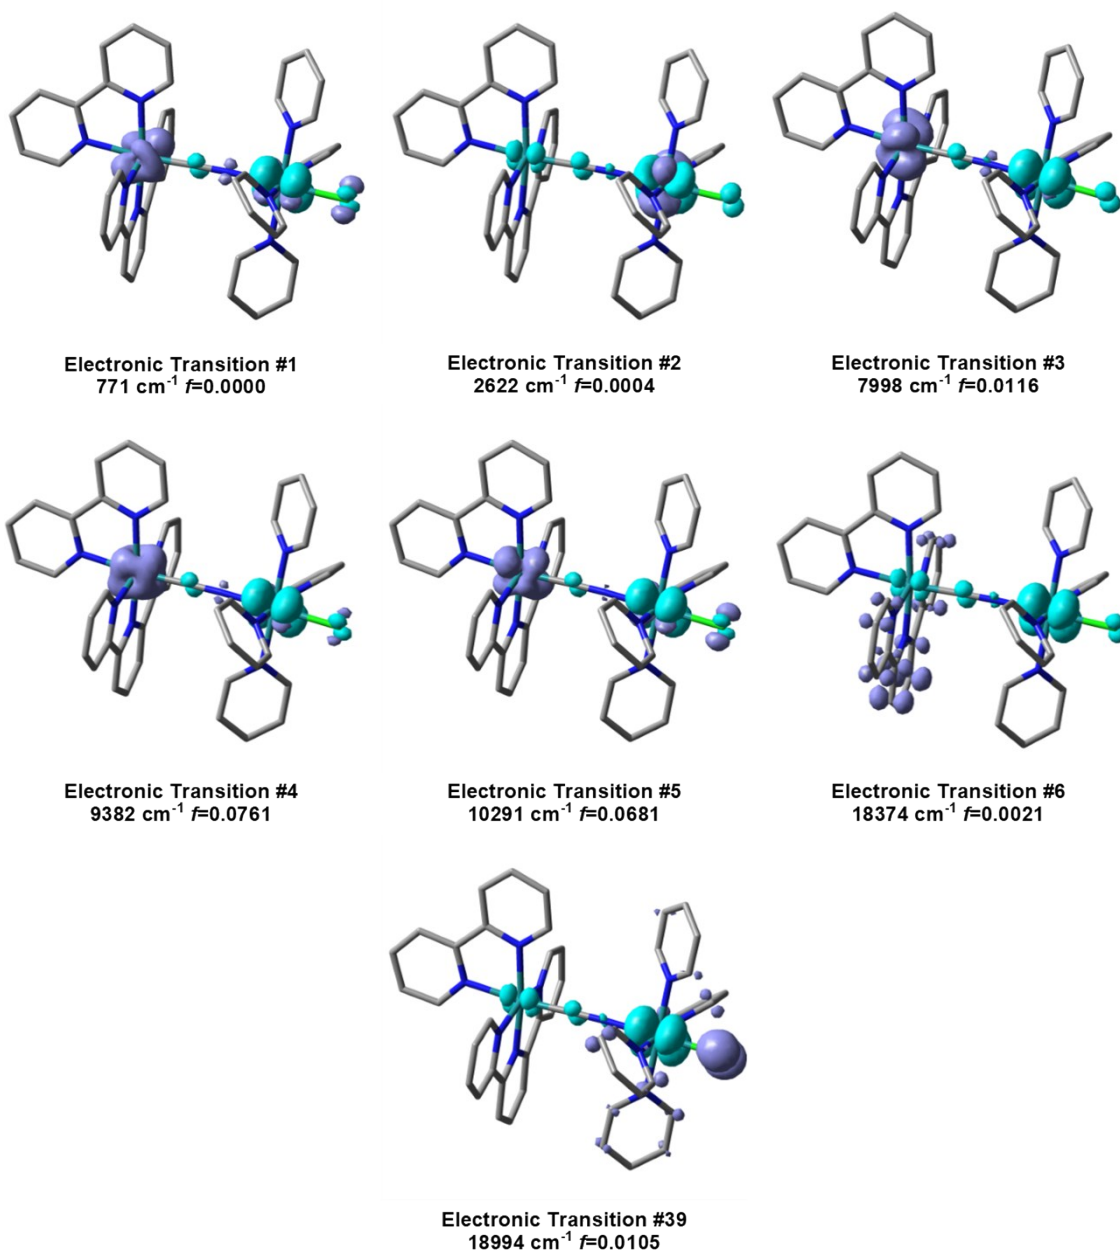**Figure S9-D.** Electron density difference maps of the lowest energy electronic transitions for doublet  $\text{RuRuCl}^{3+}$  ion. Purple indicates a decrease in charge density, while cyan indicates an increase.

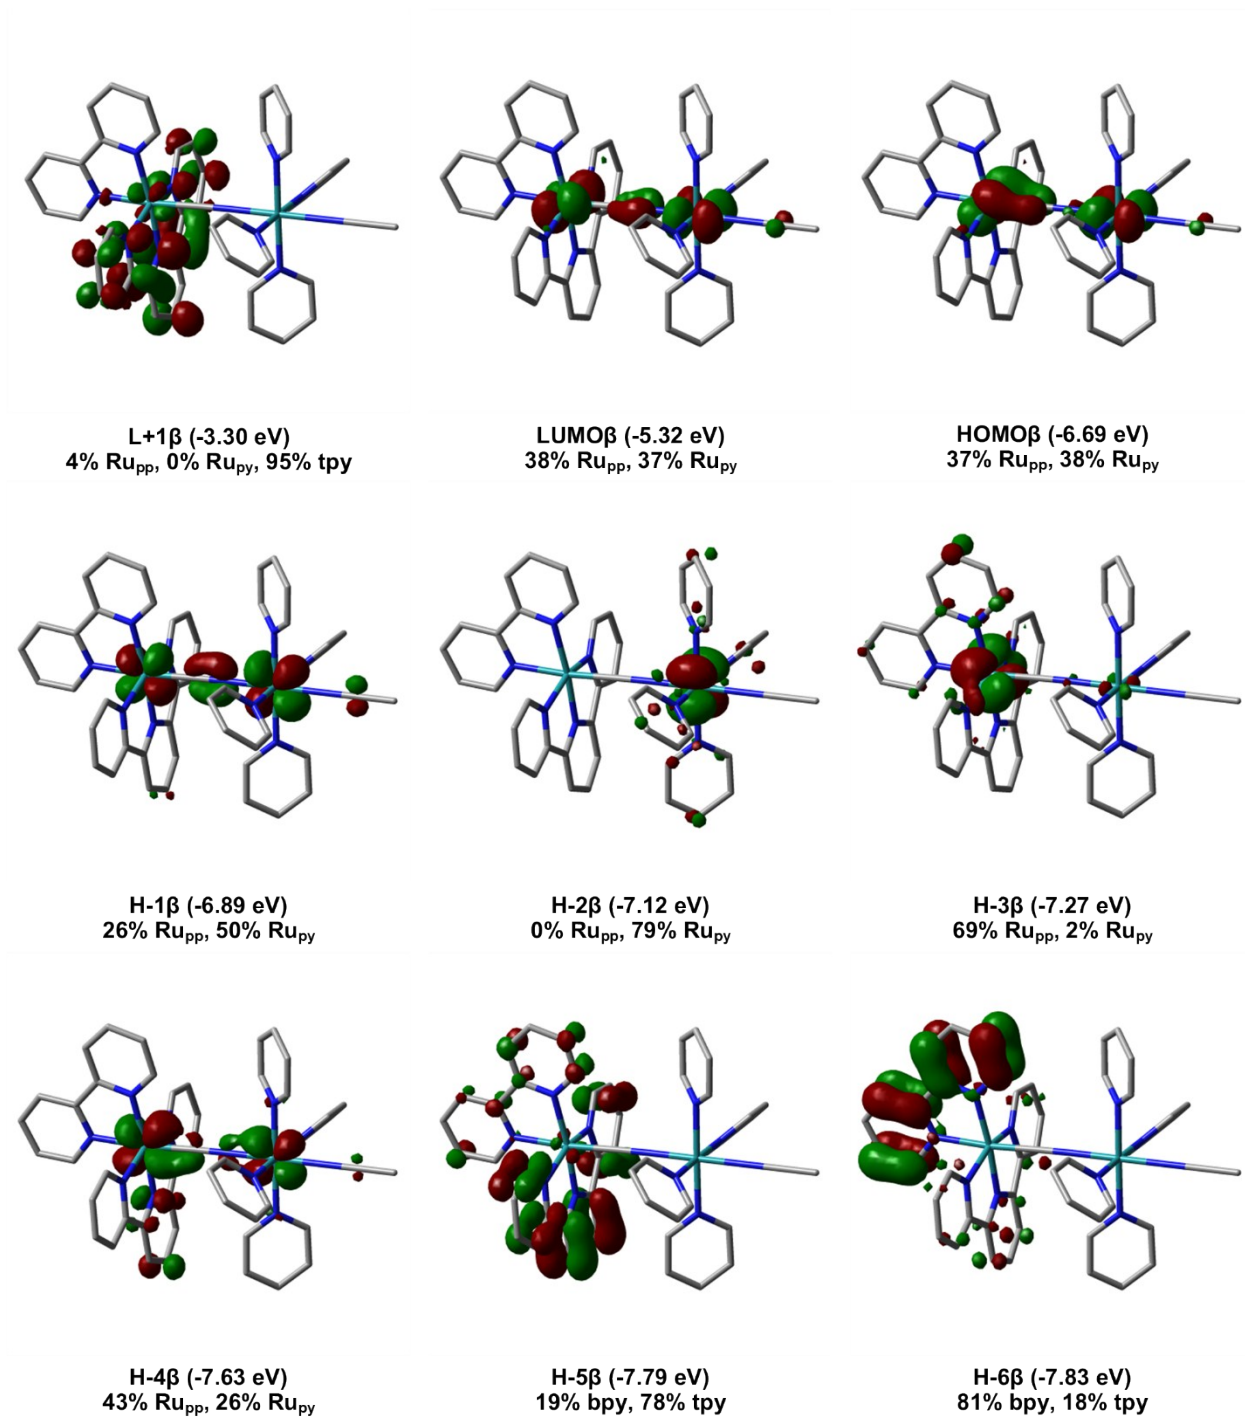

**Figure S10-A.** Computed  $\beta$ -orbitals for the doublet  $\text{RuRuACN}^{4+}$  ion calculated in MeCN.

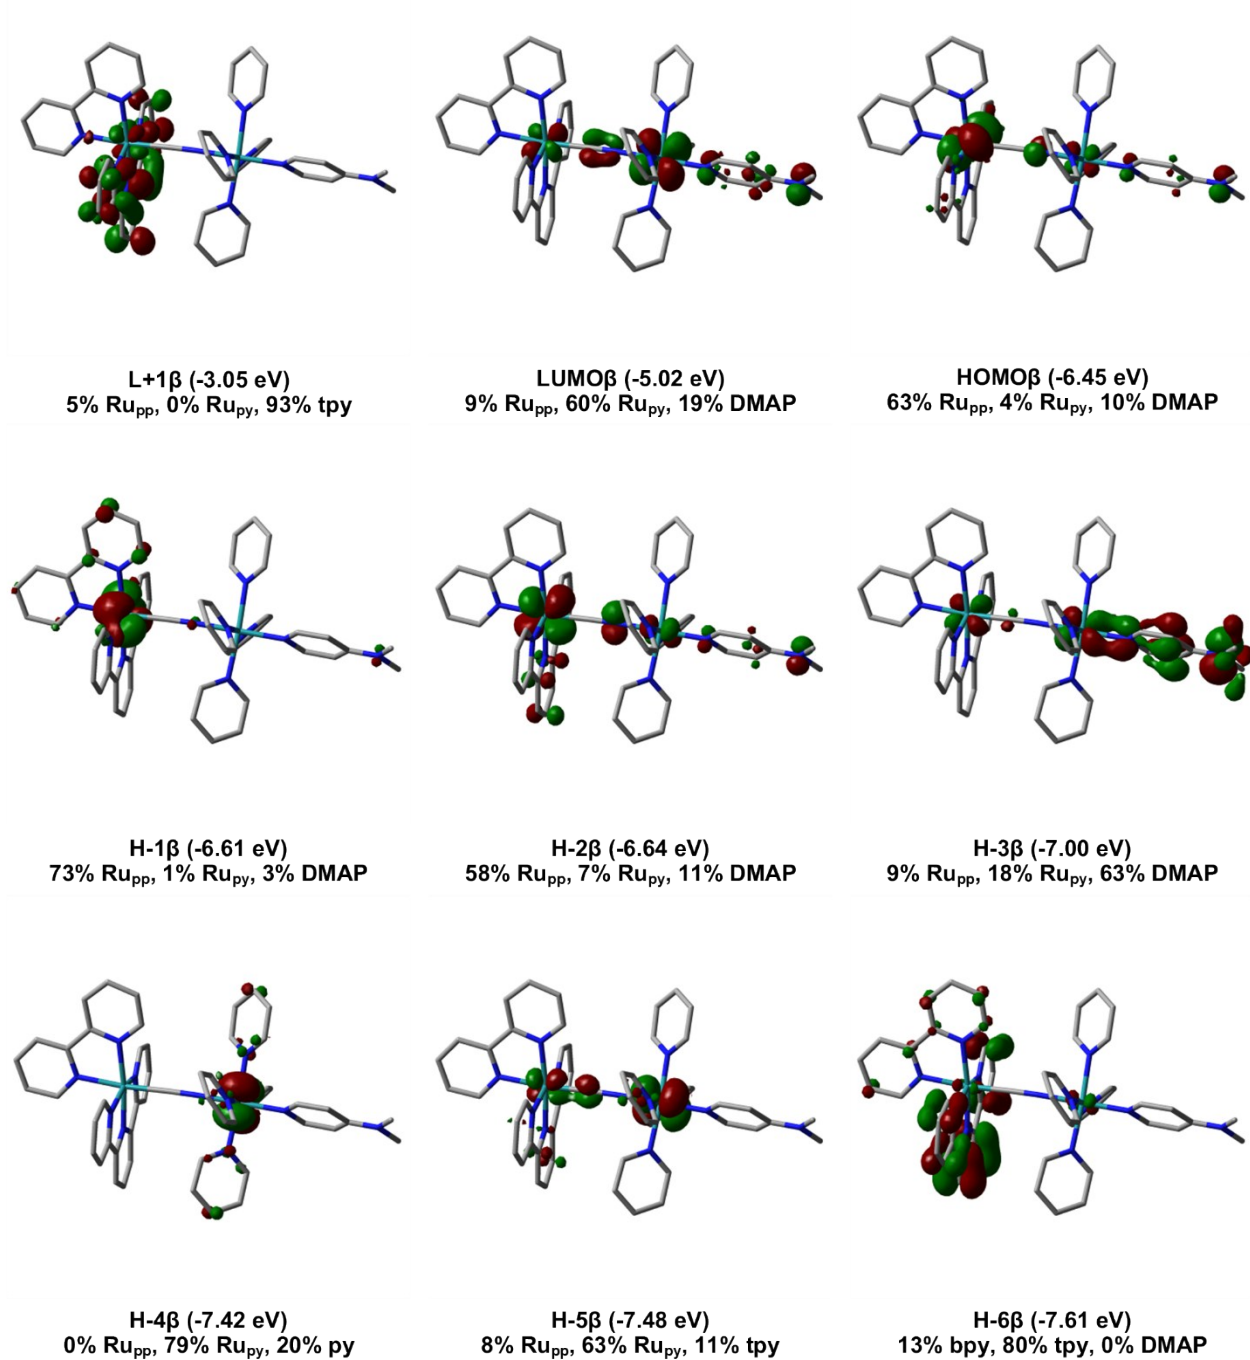

**Figure S10-B.** Computed  $\beta$ -orbitals for the doublet  $\text{RuRuDMAP}^{4+}$  ion calculated in MeCN.

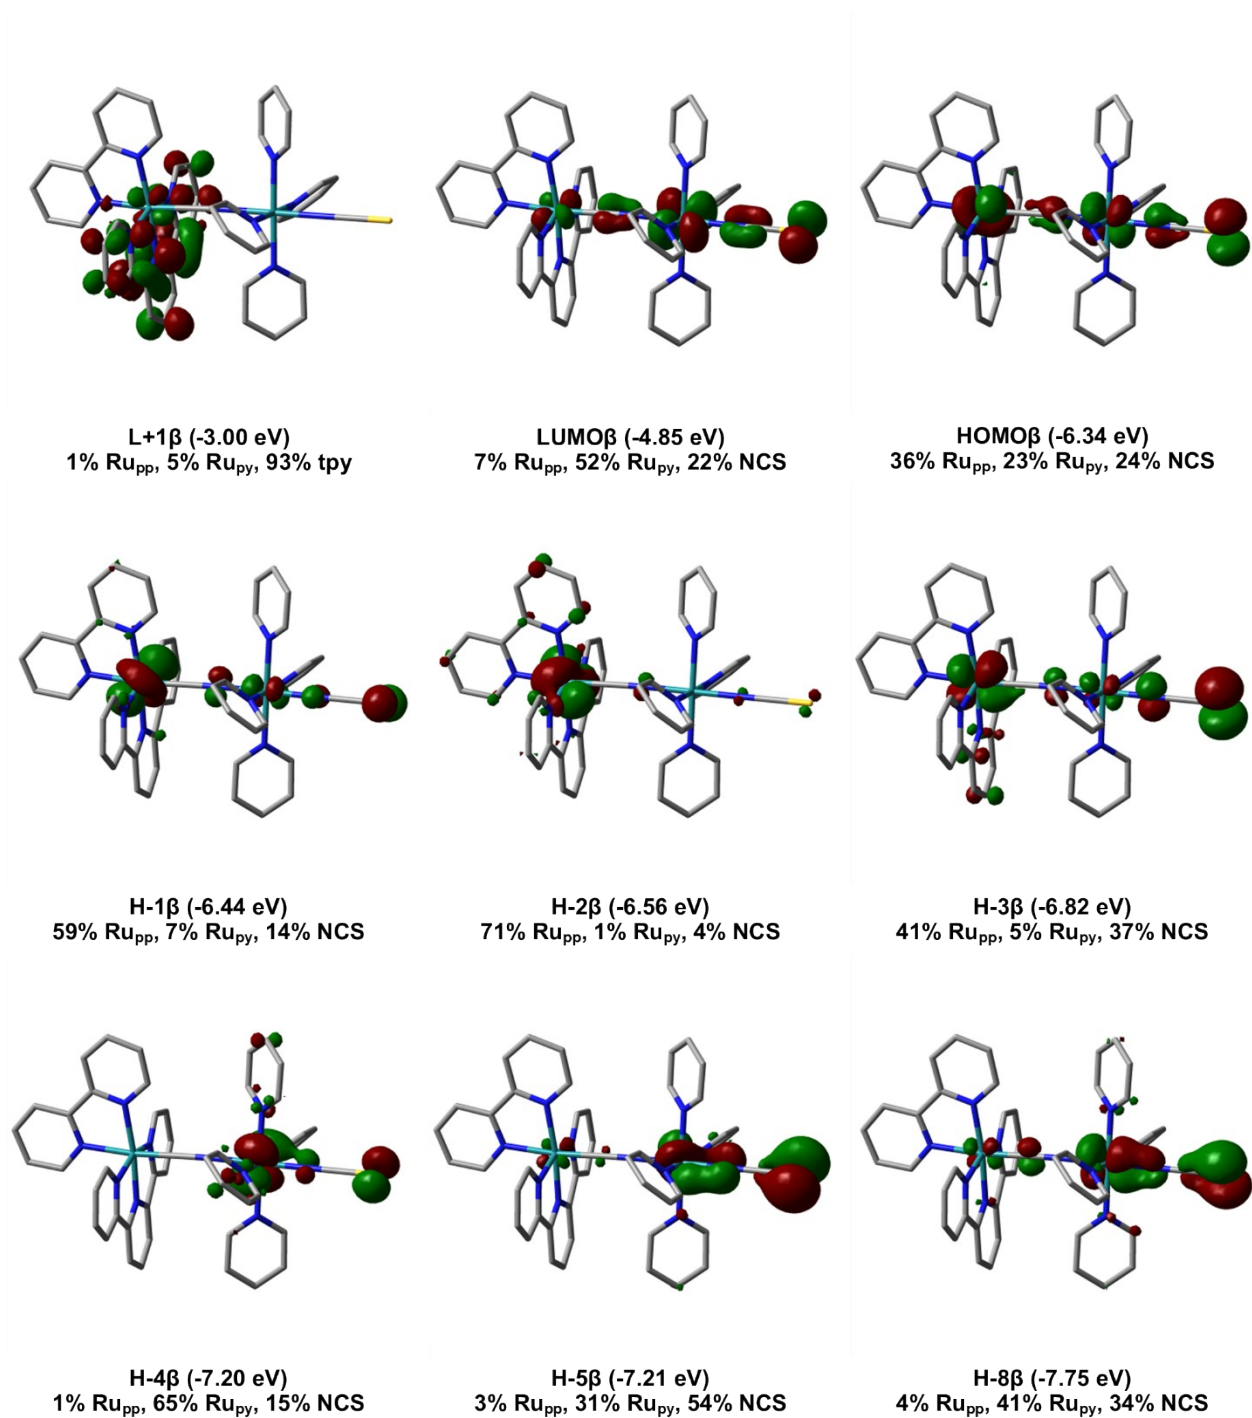

Figure S10-C. Computed  $\beta$ -orbitals for the doublet  $\text{RuRuNCS}^{3+}$  ion calculated in MeCN.

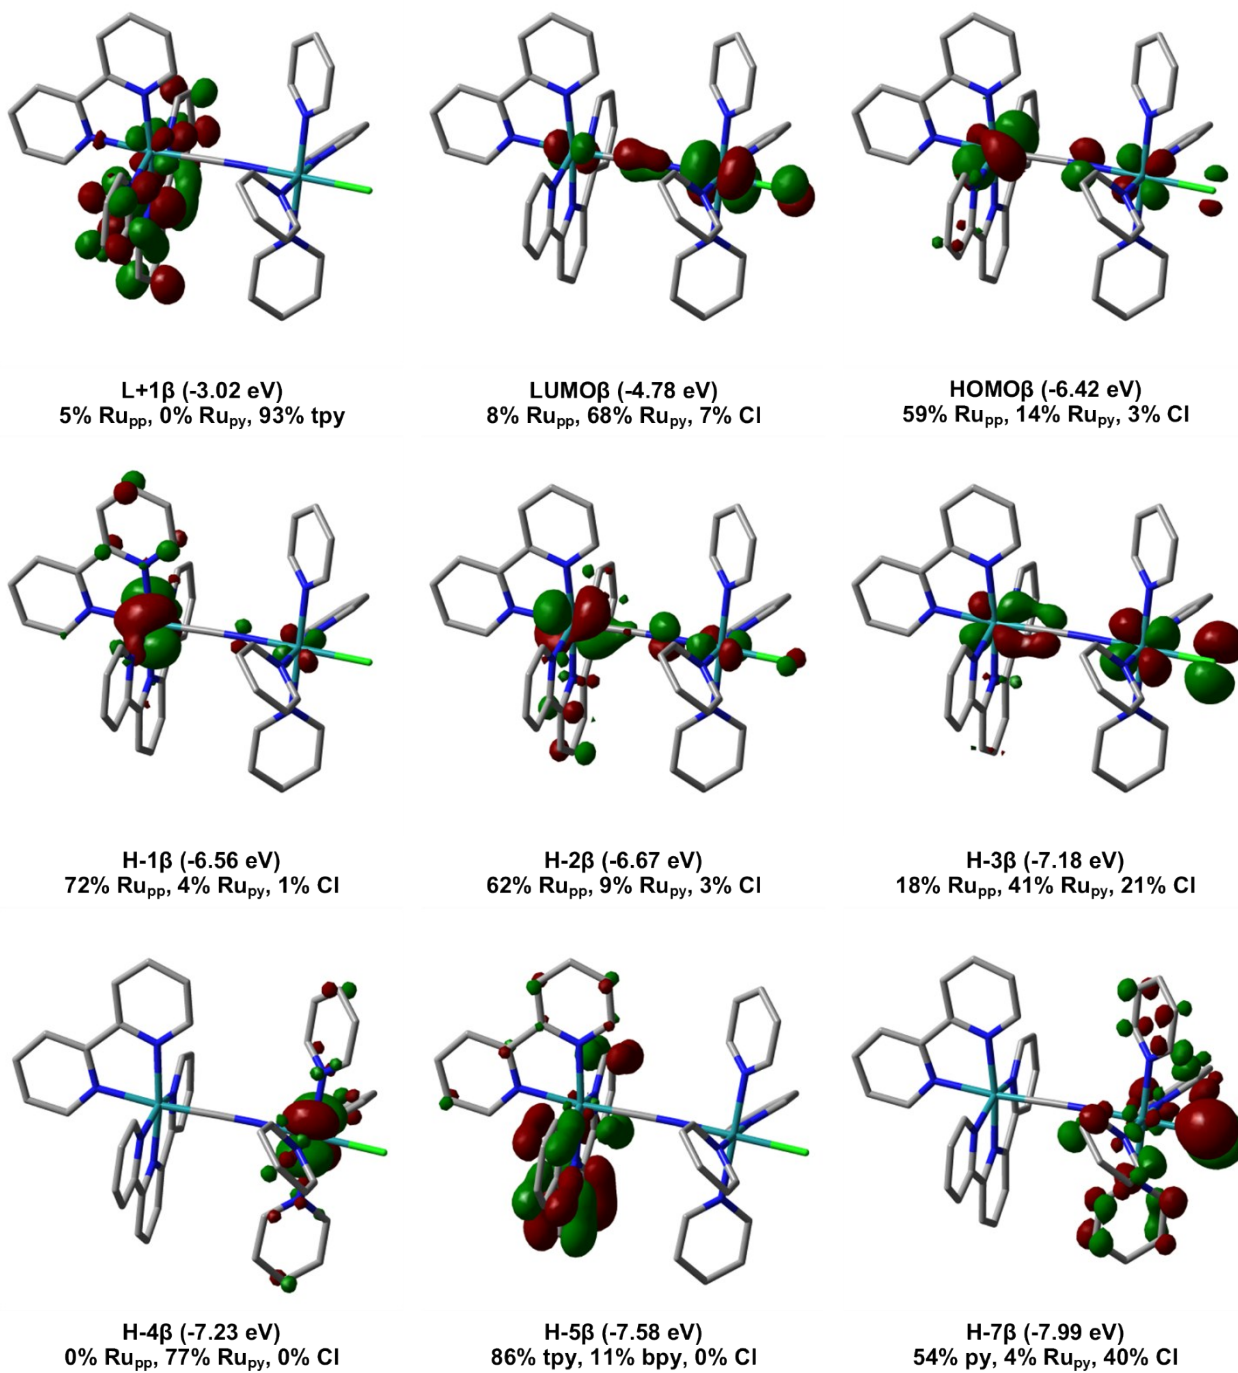

Figure S10-D. Computed  $\beta$ -orbitals for the doublet  $\text{RuRuCl}^{3+}$  ion calculated in MeCN.

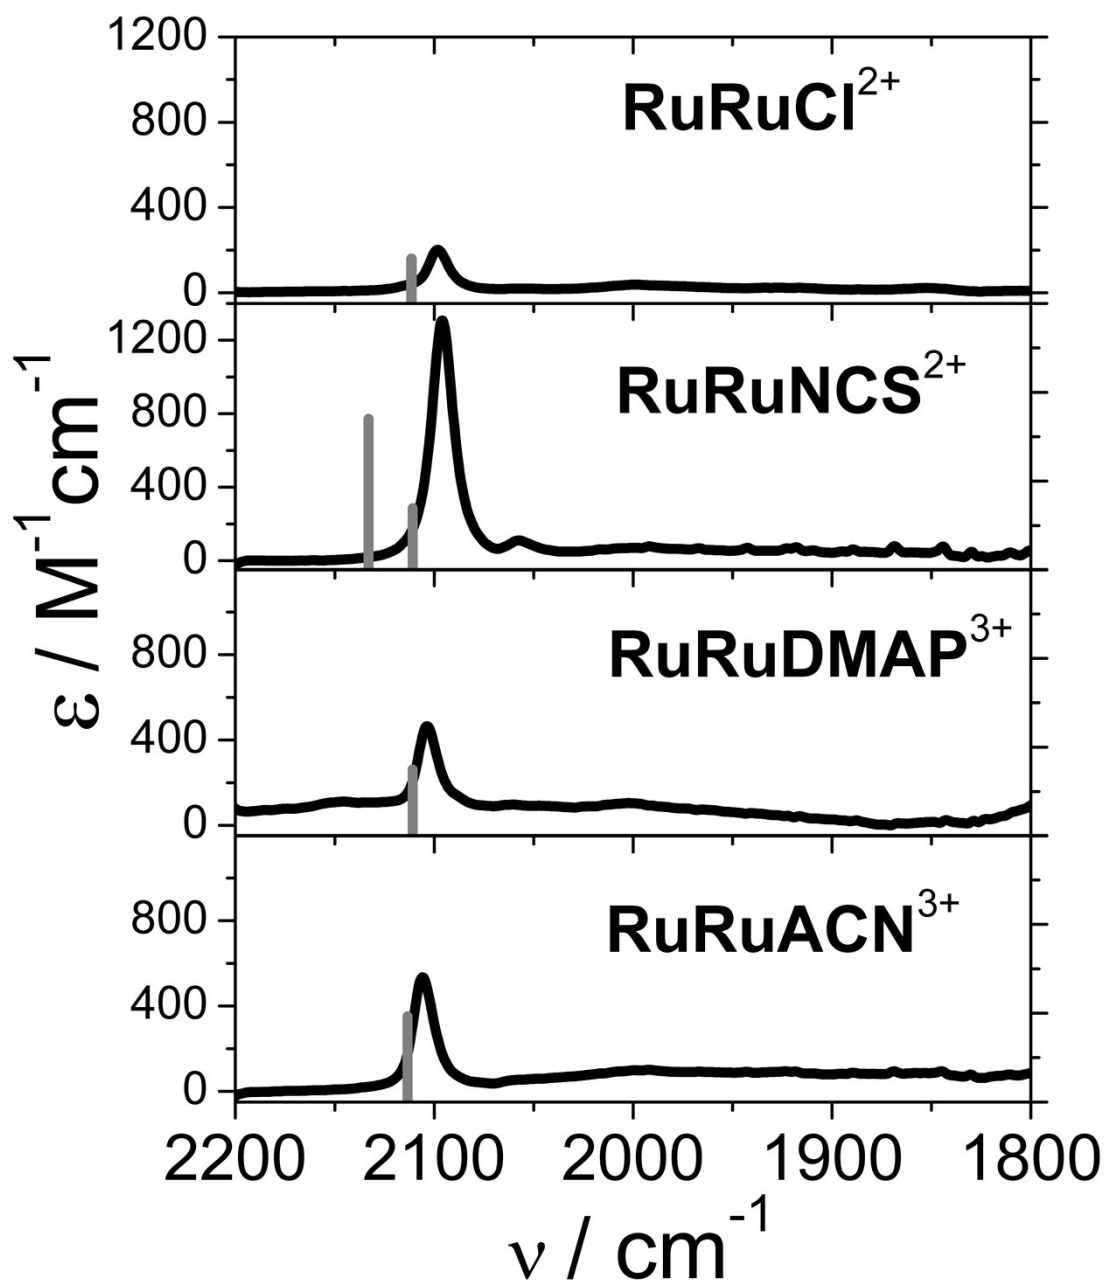

**Figure S11.** Comparison of the experimental IR spectra of the **RuRuL** complexes species in acetonitrile/0.1 M [TBA]PF<sub>6</sub> and the energy of the cyanide stretch calculated by (TD)DFT calculations (bars).

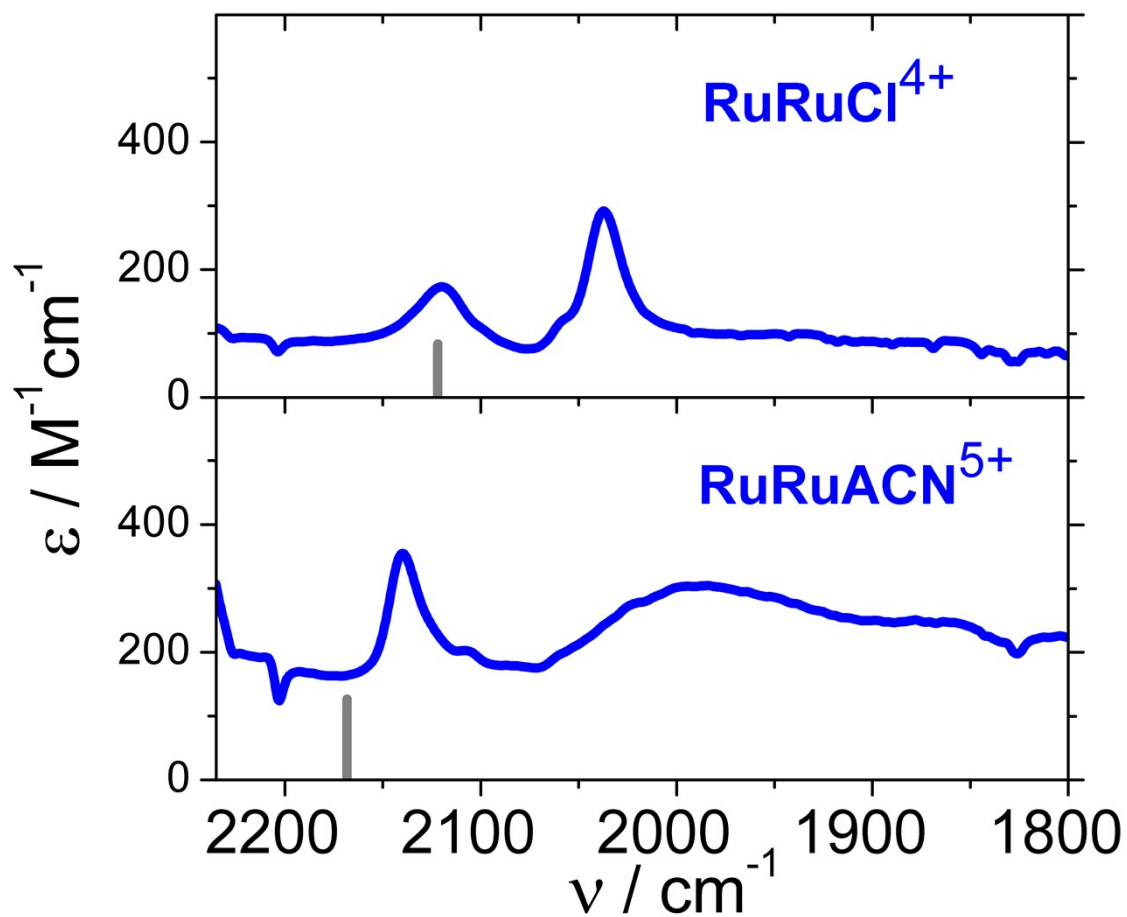

**Figure S12.** Comparison of the experimental IR spectra of the **RuRuL** complexes species in acetonitrile/0.1 M [TBA]PF<sub>6</sub> and the energy of the cyanide stretch calculated by (TD)DFT calculations (bars).



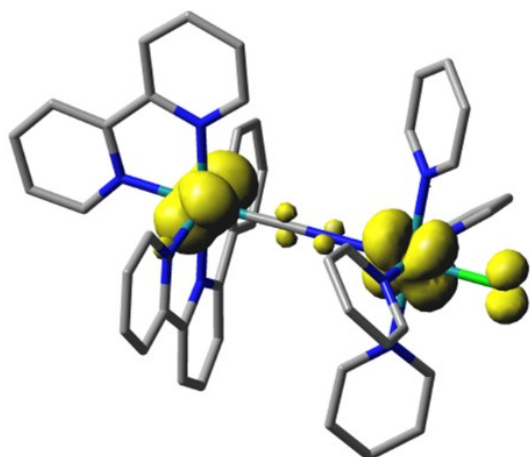

**RuRuCl<sup>4+</sup>**  
89% Ru<sub>pp</sub>, 91%Ru<sub>py</sub>

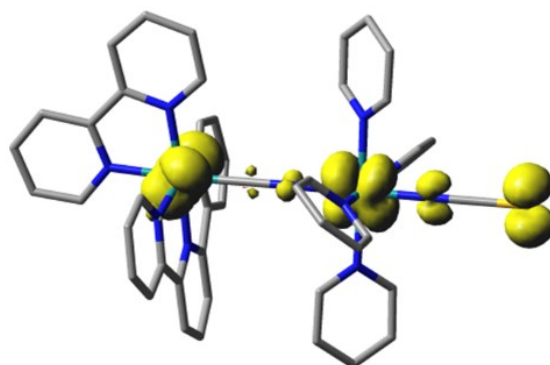

**RuRuNCS<sup>4+</sup>**  
88% Ru<sub>pp</sub>, 71%Ru<sub>py</sub>

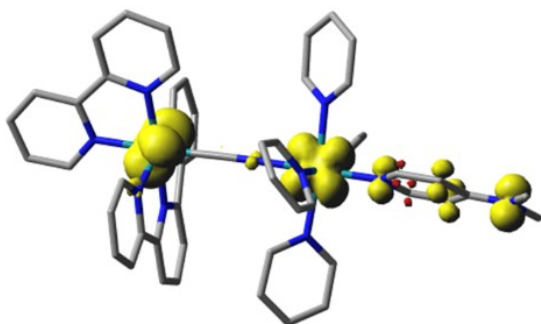

**RuRuDMAP<sup>5+</sup>**  
90% Ru<sub>pp</sub>, 73%Ru<sub>py</sub>

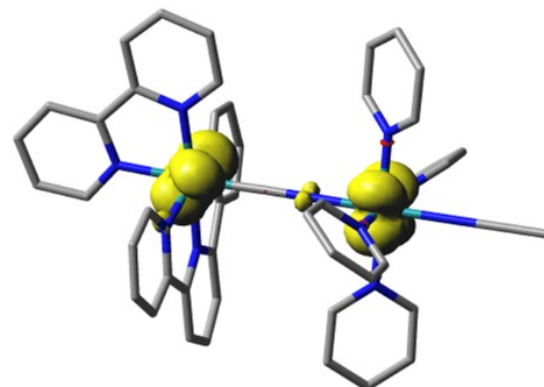

**RuRuACN<sup>5+</sup>**  
90% Ru<sub>pp</sub>, 97%Ru<sub>py</sub>

**Figure S13.** Computed spin density and Mulliken spin densities for the **RuRuL** (III,III) species.

## Comparison between Ruthenium Polypyridines Siblings

**Table S5.** Energy and molar absorptivity of the IVCT transition the family of complexes  $[\text{Ru}(\text{tpy})(\text{bpy})(\mu\text{-CN})\text{Ru}(\text{bpy})_2\text{L}]^{4/3+}$  and  $[\text{Ru}(\text{tpy})(\text{bpy})(\mu\text{-CN})\text{Ru}(\text{py})_4\text{L}]^{4/3+}$ .

| L                | $[\text{Ru}(\text{tpy})(\text{bpy})(\mu\text{-CN})\text{Ru}(\text{bpy})_2\text{L}]^{4/3+}$ * |                                                                                                                | $[\text{Ru}(\text{tpy})(\text{bpy})(\mu\text{-CN})\text{Ru}(\text{py})_4\text{L}]^{4/3+}$ |                                                                                                                |
|------------------|----------------------------------------------------------------------------------------------|----------------------------------------------------------------------------------------------------------------|-------------------------------------------------------------------------------------------|----------------------------------------------------------------------------------------------------------------|
|                  | $\Delta E / \text{V}$                                                                        | $\nu_{\text{max}} / 10^3 \text{ cm}^{-1}$<br>( $\epsilon_{\text{max}} / 10^3 \text{ M}^{-1} \text{ cm}^{-1}$ ) | $\Delta E / \text{V}$                                                                     | $\nu_{\text{max}} / 10^3 \text{ cm}^{-1}$<br>( $\epsilon_{\text{max}} / 10^3 \text{ M}^{-1} \text{ cm}^{-1}$ ) |
| Cl <sup>-</sup>  | 0.83                                                                                         | 10.8 (2.6)                                                                                                     | 0.87                                                                                      | 10.4 (3.9)                                                                                                     |
| SCN <sup>-</sup> | 0.63                                                                                         | 9.5 (3.2)                                                                                                      | 0.75                                                                                      | 9.7 (4.3)                                                                                                      |
| DMAP             | 0.58                                                                                         | 8.4 (4.0)                                                                                                      | 0.61                                                                                      | 8.9 (7.5)                                                                                                      |
| ACN              | 0.53                                                                                         | 6.9 (9.3)                                                                                                      | 0.44                                                                                      | 6.8 (9.5)                                                                                                      |

\* Data extracted from Ref <sup>2</sup>

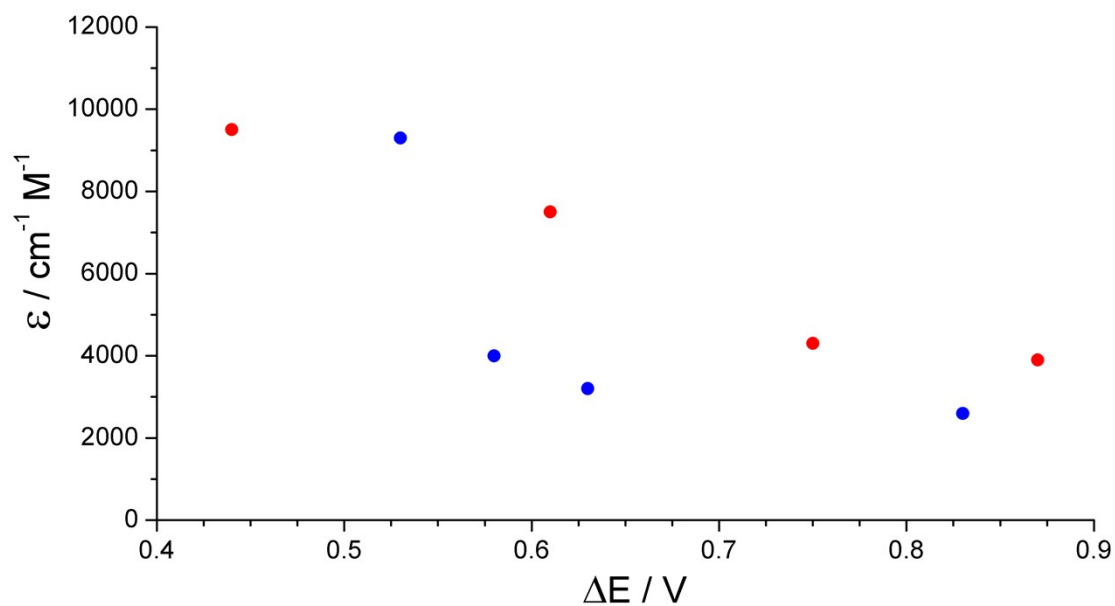

**Figure S14.** Dependence of the molar absorptivity of the IVCT transition with  $\Delta E_{\%}$  between the two redox couples for the family of complexes  $[\text{Ru}(\text{tpy})(\text{bpy})(\mu\text{-CN})\text{Ru}(\text{bpy})_2\text{L}]^{4/3+}$  (blue) and  $[\text{Ru}(\text{tpy})(\text{bpy})(\mu\text{-CN})\text{Ru}(\text{py})_4\text{L}]^{4/3+}$  (red).

## References

- (1) Cadranel, A.; Tate, J. E.; Oviedo, P. S.; Yamazaki, S.; Hodak, J. H.; Baraldo, L. M.; Kleiman, V. D. Distant Ultrafast Energy Transfer in a Trimetallic {Ru–Ru–Cr} Complex Facilitated by Hole Delocalization. *Phys. Chem. Chem. Phys.* **2017**, *19* (4), 2882–2893. <https://doi.org/10.1039/C6CP06562G>.
- (2) Oviedo, P. S.; Pieslinger, G. E.; Cadranel, A.; Baraldo, L. M. Exploring the Localized to Delocalized Transition in Non-Symmetric Bimetallic Ruthenium Polypyridines. *Dalt. Trans.* **2017**, *46* (45), 15757–15768. <https://doi.org/10.1039/C7DT02422C>.
